# Supplementary material for: Semi-synthesis, structural modification and biological evaluation of 5-arylbenzofuran neolignans
Source: Royal Society of Chemistry journal article supplement (doi:10.1039/c8ra04773a), 2018-01-01

## Supplement material

A one-pot method of Wacker-type cyclization and Wacker-type oxidation was developed (Scheme 1S). Wacker-type cyclization required the participation of base which inhibited the process of Wacker-type oxidation (Scheme 1S-a). For removing the impact of base and realizing one-pot method, a variety of acids such as HCOOH, CH<sub>3</sub>COOH and TsOH were added respectively in the middle of reaction (Scheme 1S-b). Among them, the reaction in the presence of trifluoroacetic acid (TFA) showed the highest yield of 61% for two-step (Scheme 1S-c). However, the supplement of catalyst was necessary in our batch reactor (Scheme 1S-d), because the palladium chloride of first step was deactivated in the charging process, which may be solved in continuous reactor.

### Wacker-type cyclization

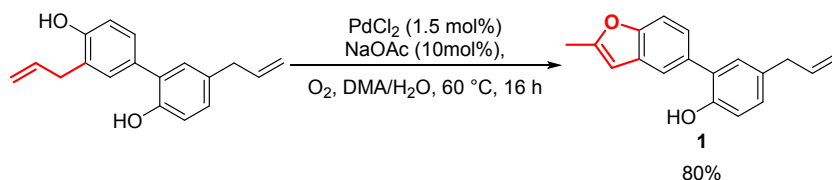

### Wacker-type oxidation

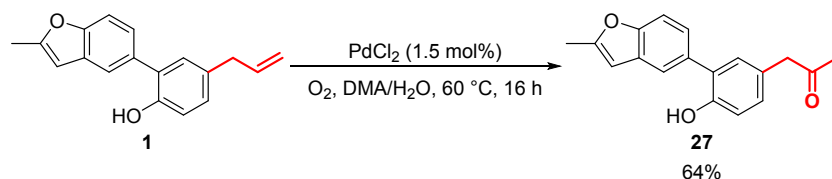

### One-pot process of Wacker-type cyclization and Wacker-type oxidation

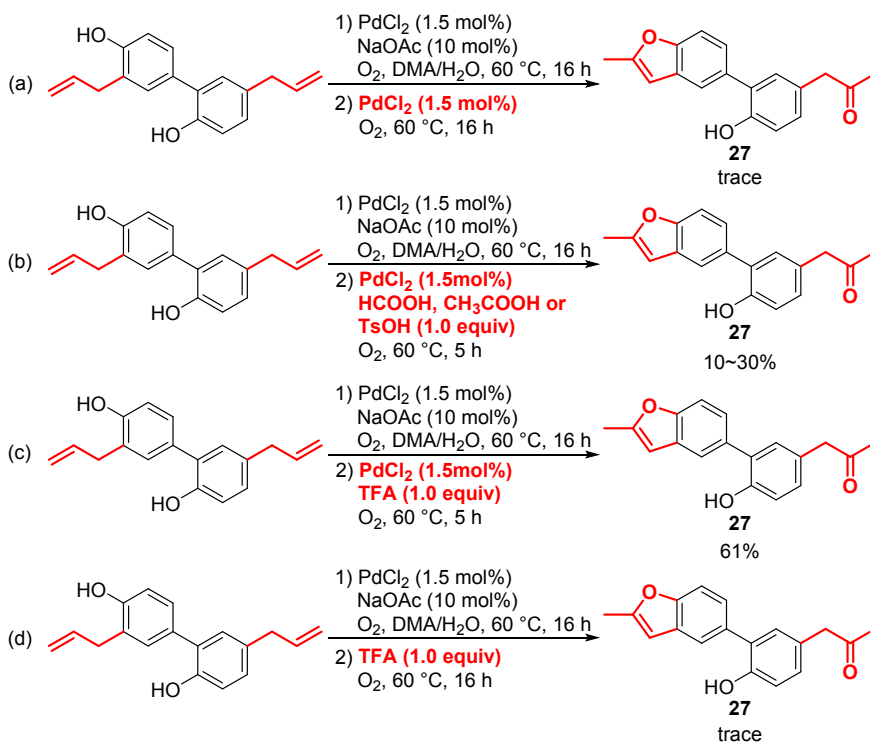

**Scheme 1S** One-pot process of Wacker-type cyclization and Wacker-type oxidation.

The  $^1\text{H}$  NMR (400MHz,  $\text{CDCl}_3$ ) and  $^{13}\text{C}$  NMR (101 MHz,  $\text{CDCl}_3$ ) of compound 1

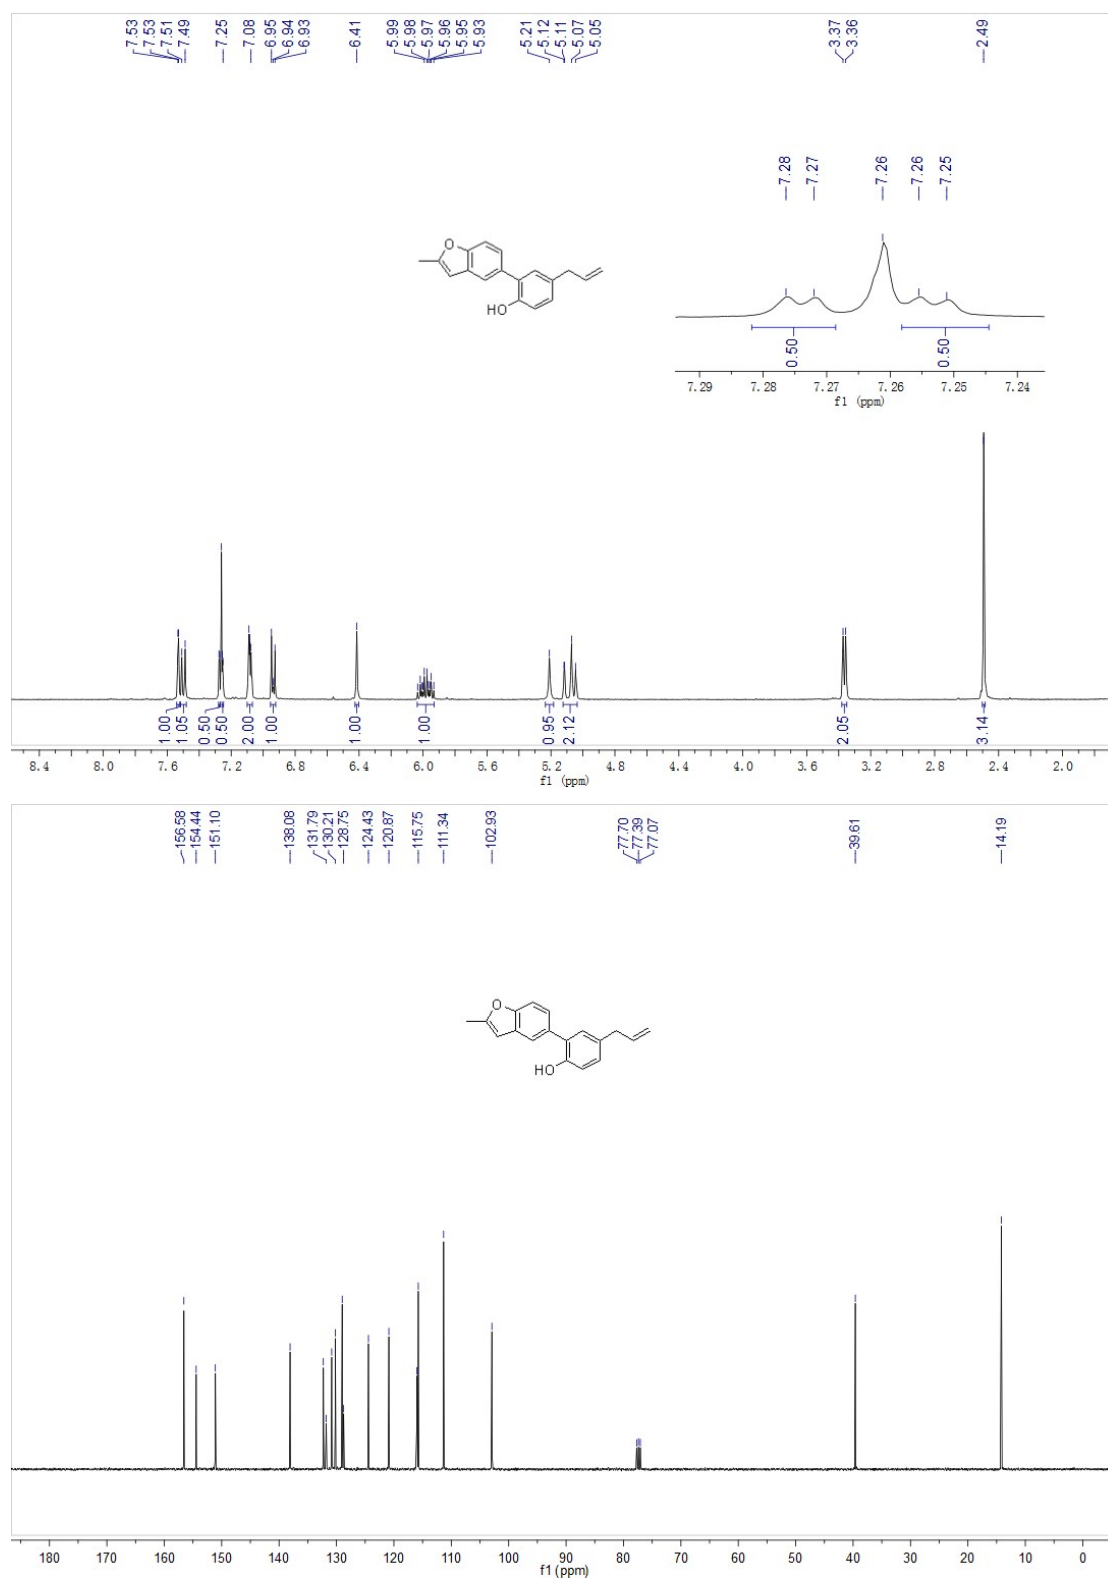

The  $^1\text{H}$  NMR (400MHz,  $\text{CDCl}_3$ ) and  $^{13}\text{C}$  NMR (101 MHz,  $\text{CDCl}_3$ ) of compound **2**

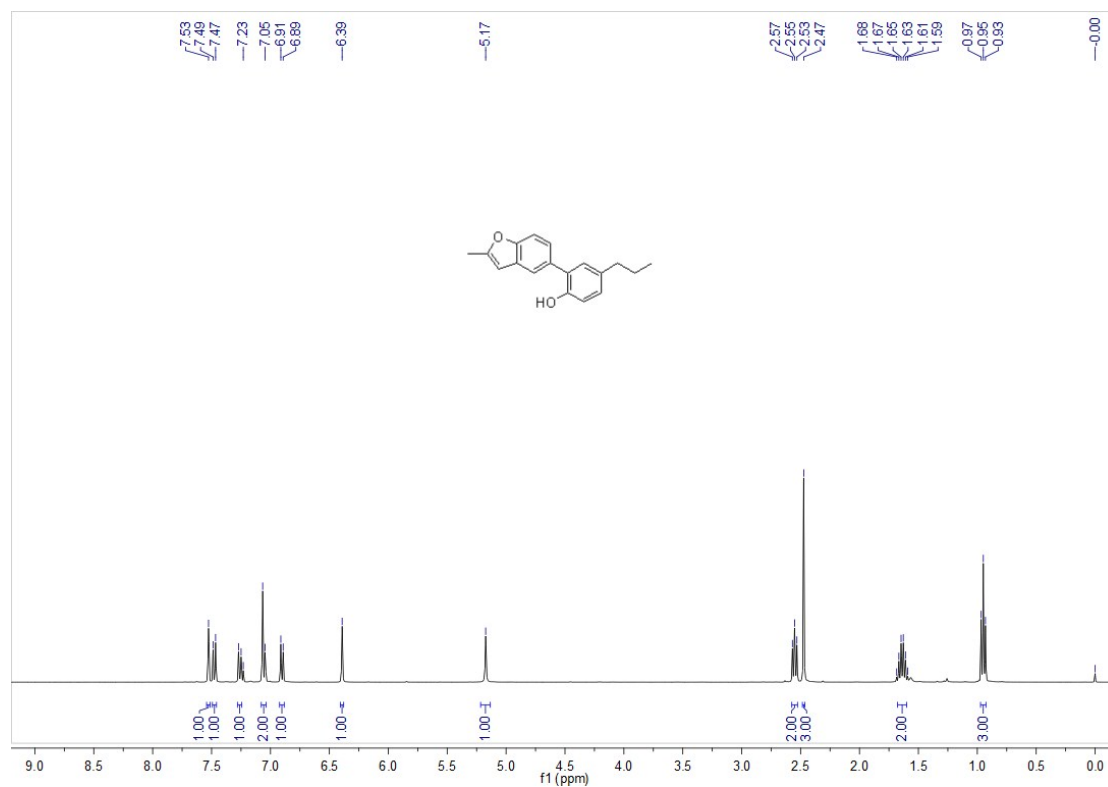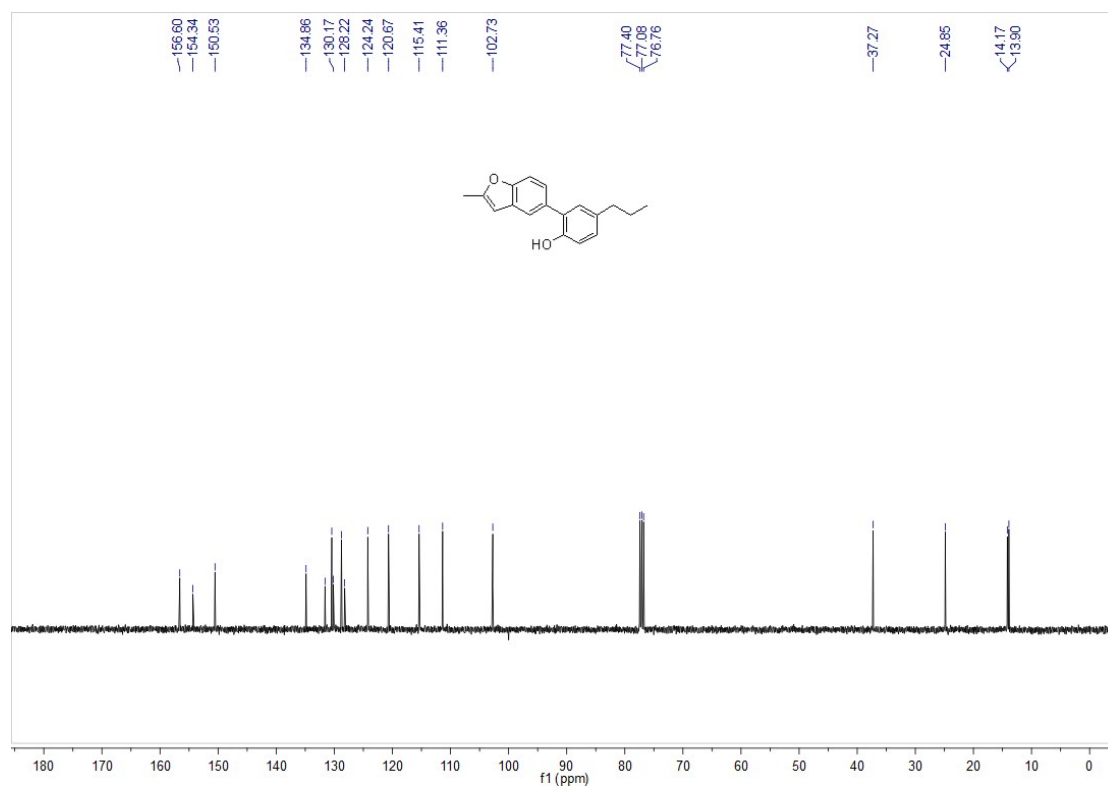

The  $^1\text{H}$  NMR (400MHz,  $\text{CDCl}_3$ ) and  $^{13}\text{C}$  NMR (101 MHz,  $\text{CDCl}_3$ ) of compound **3**

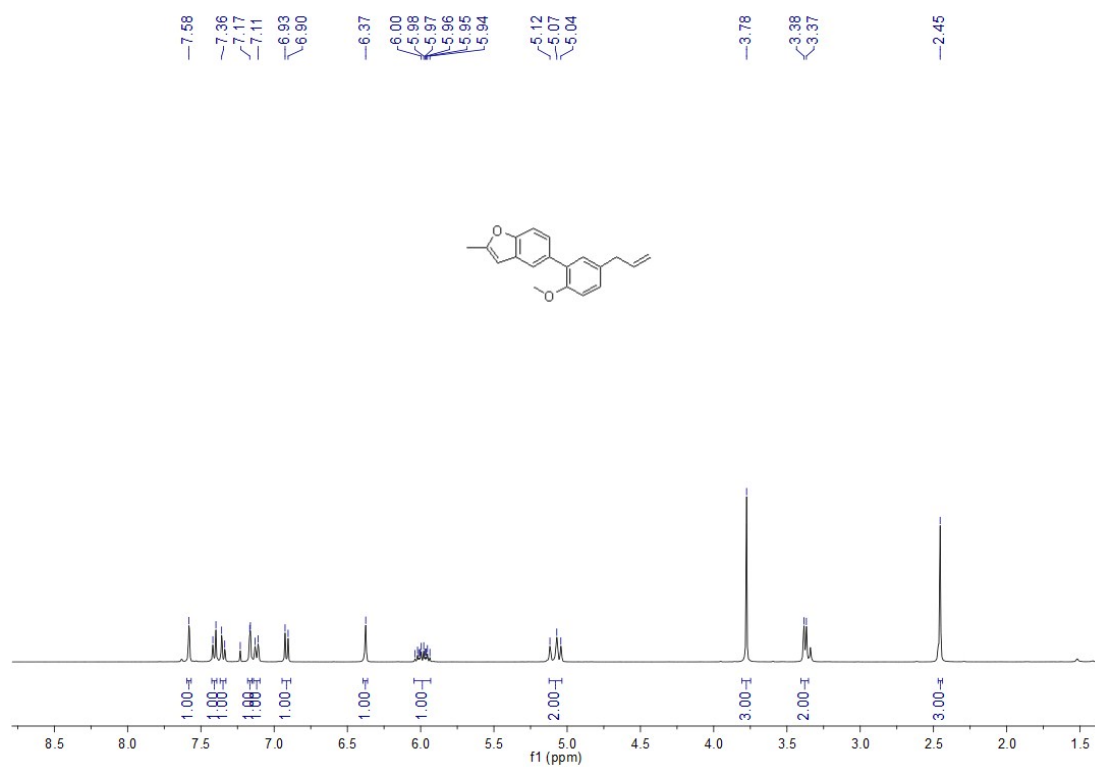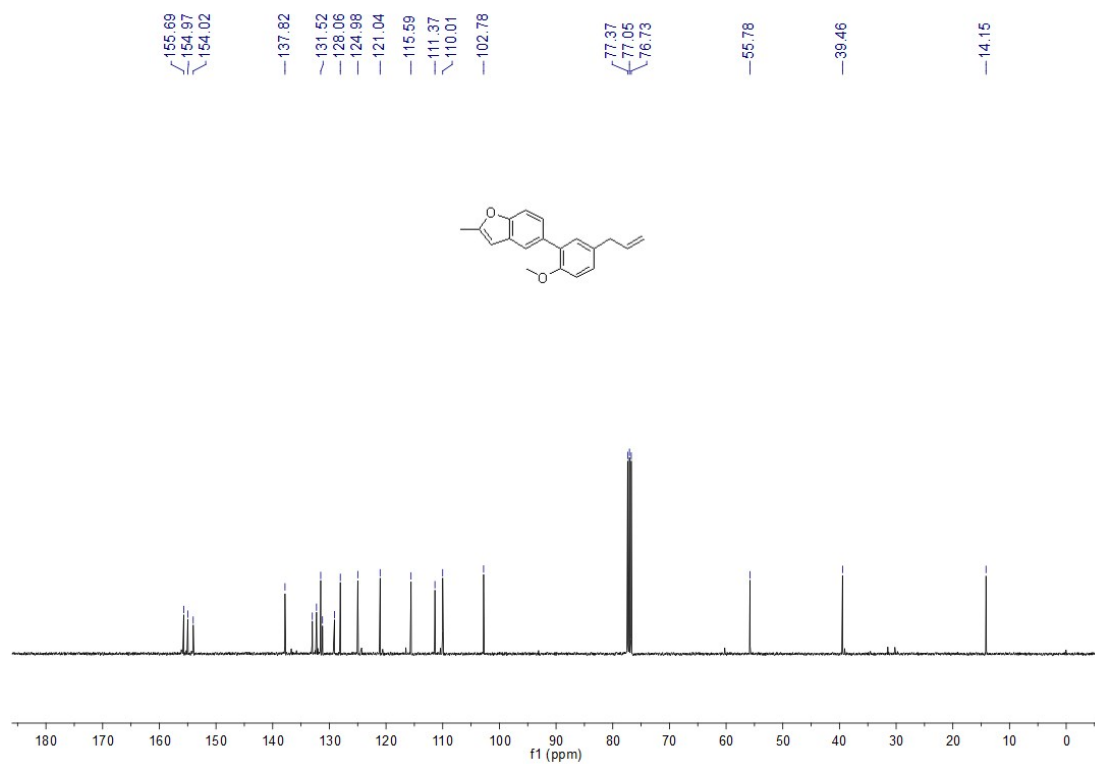

The  $^1\text{H}$  NMR (400MHz,  $\text{CDCl}_3$ ) and  $^{13}\text{C}$  NMR (101 MHz,  $\text{CDCl}_3$ ) of compound **4**

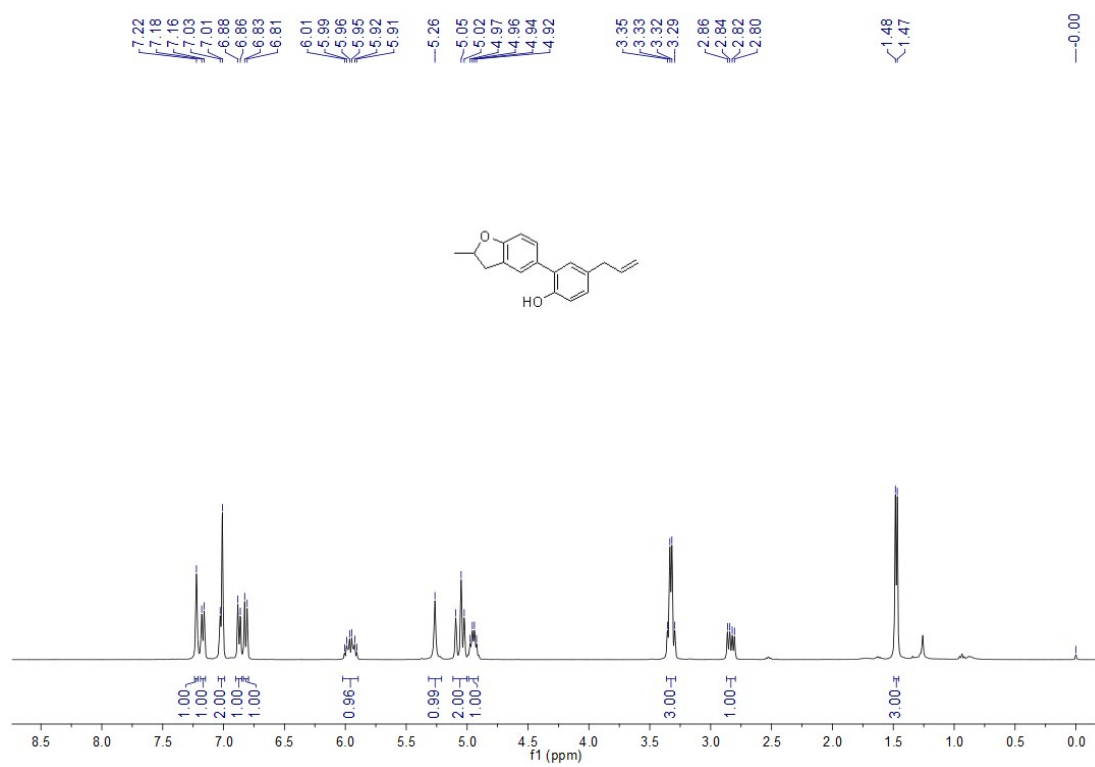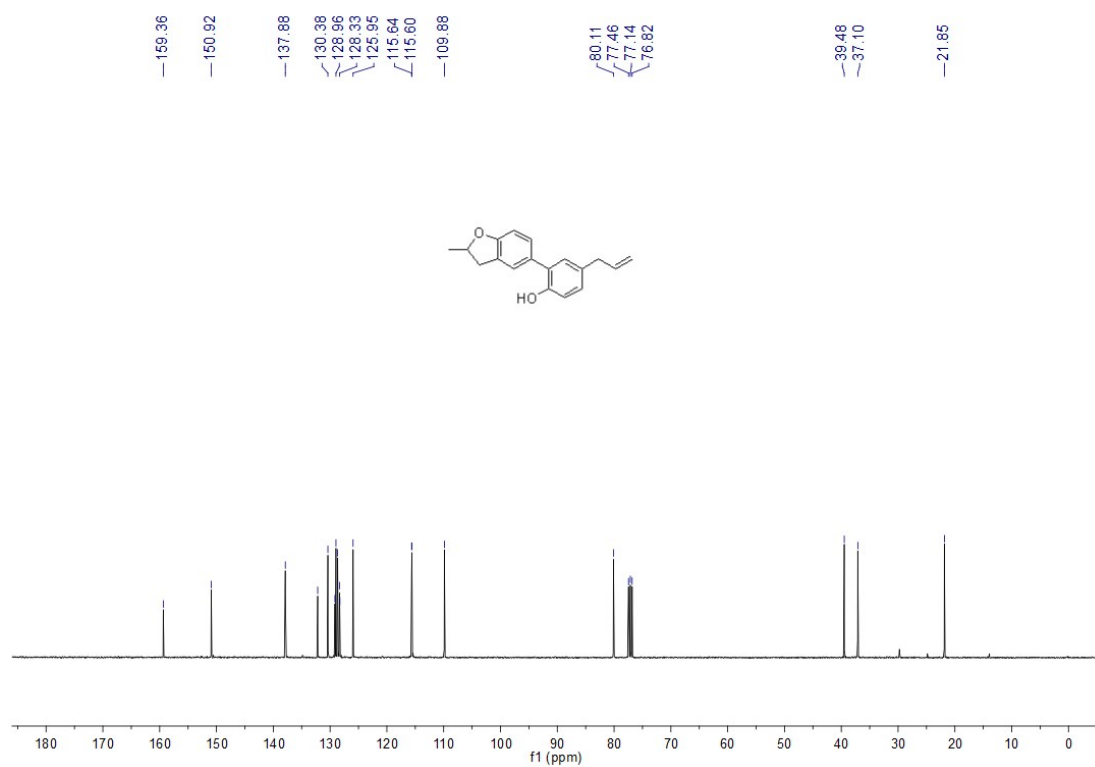

The  $^1\text{H}$  NMR (400MHz,  $\text{CDCl}_3$ ) and  $^{13}\text{C}$  NMR (101 MHz,  $\text{CDCl}_3$ ) of compound **5**

$^1\text{H}$  NMR peaks (ppm): 7.24, 7.20, 7.18, 7.02, 7.00, 6.87, 6.85, 6.84, 6.82, 5.28, 5.01, 4.99, 4.97, 4.85, 4.84, 4.92, 3.37, 3.35, 3.33, 3.31, 2.86, 2.82, 2.55, 2.53, 2.51, 1.63, 1.61, 1.59, 1.58, 1.48, 0.96, 0.94, 0.92

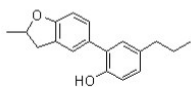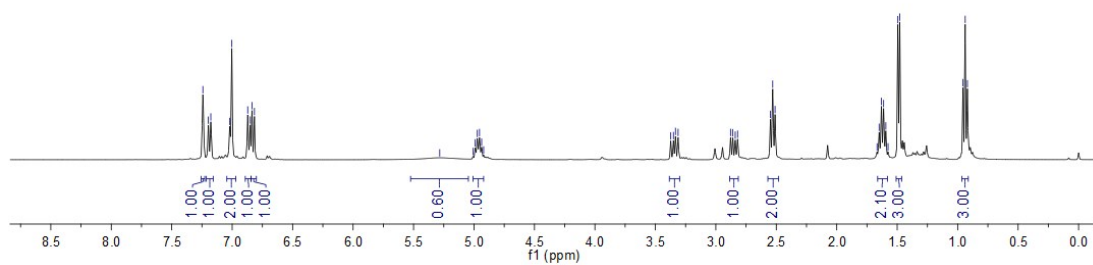

$^{13}\text{C}$  NMR peaks (ppm): 159.29, 150.56, 138.89, 128.25, 127.39, 125.93, 115.39, 109.81, 80.06, 77.41, 77.09, 76.77, 37.25, 37.11, 24.82, 21.83, 13.88

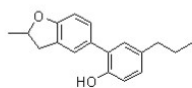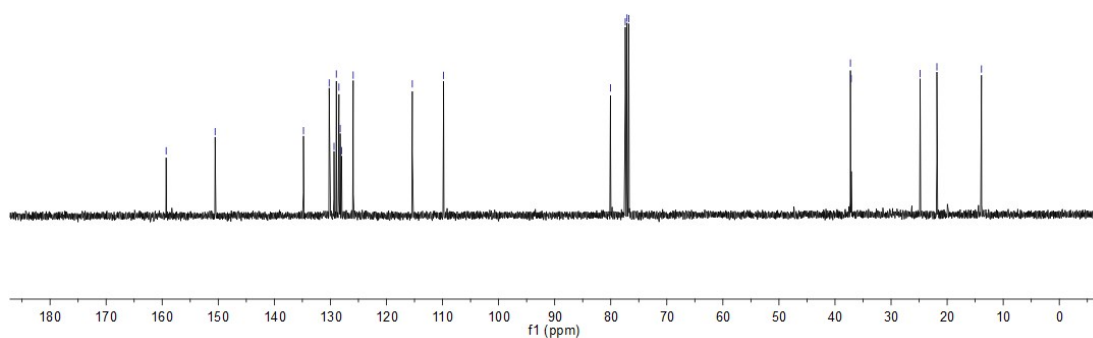

The  $^1\text{H}$  NMR (400MHz,  $\text{CDCl}_3$ ) and  $^{13}\text{C}$  NMR (101 MHz,  $\text{CDCl}_3$ ) of compound **6**

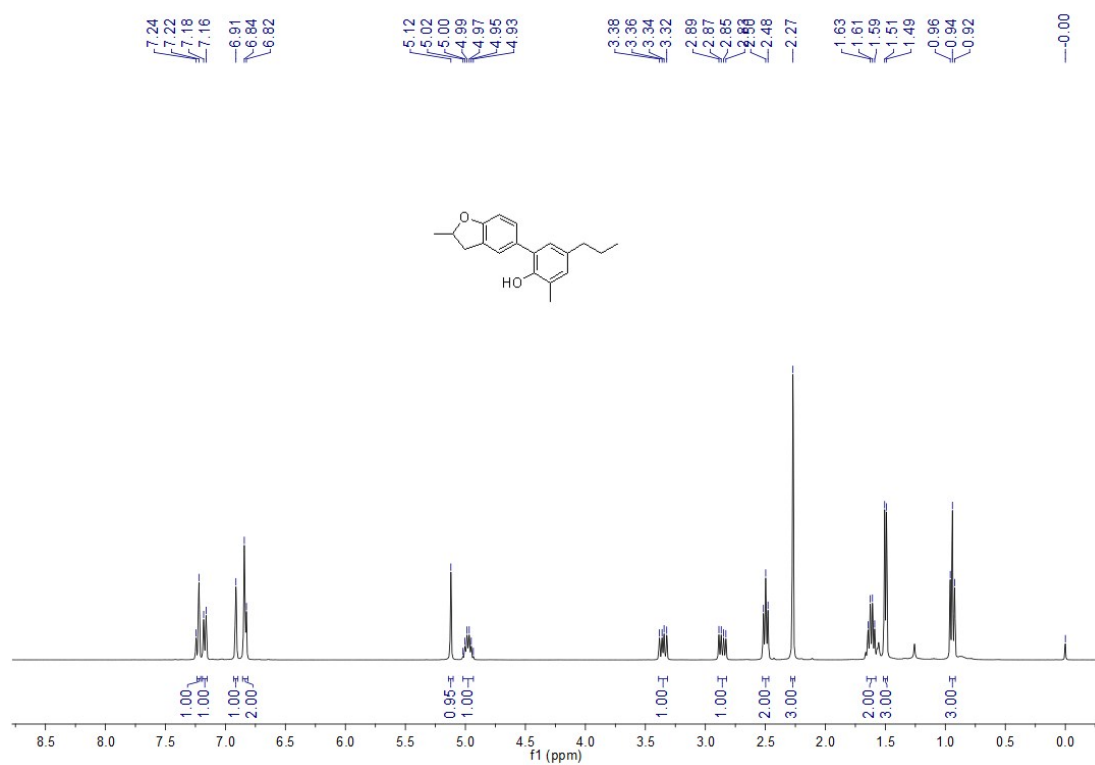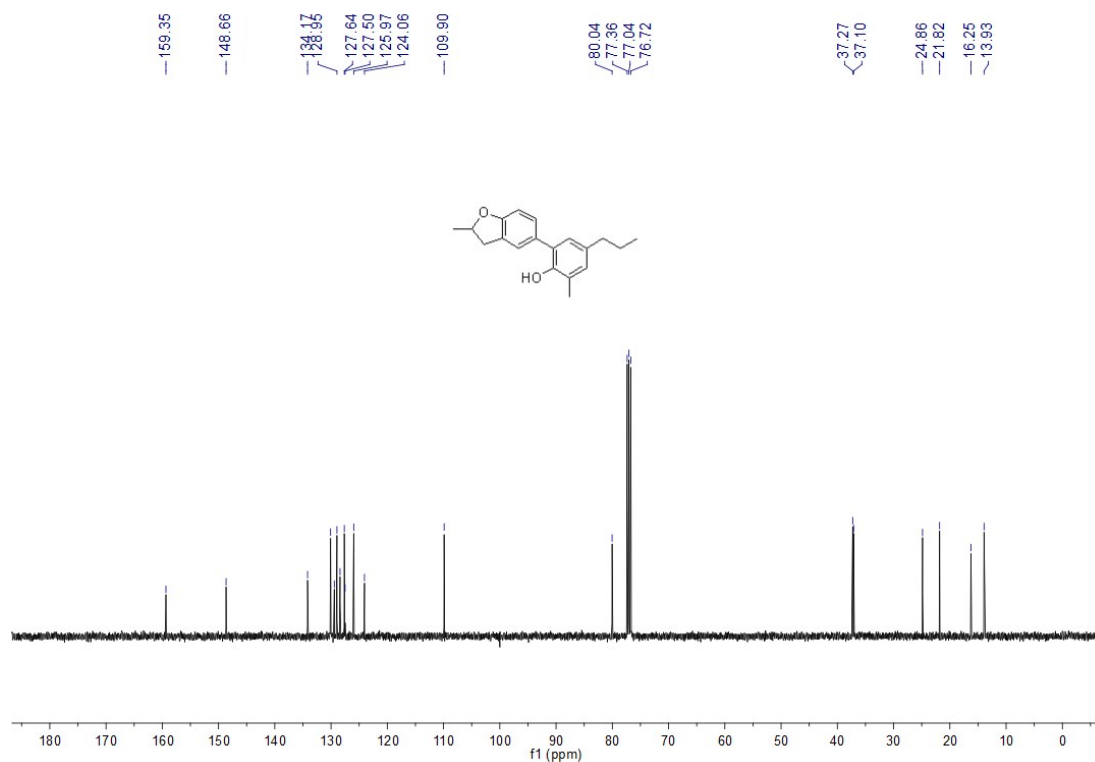

The  $^1\text{H}$  NMR (400MHz,  $\text{CDCl}_3$ ) and  $^{13}\text{C}$  NMR (101 MHz,  $\text{CDCl}_3$ ) of compound 7

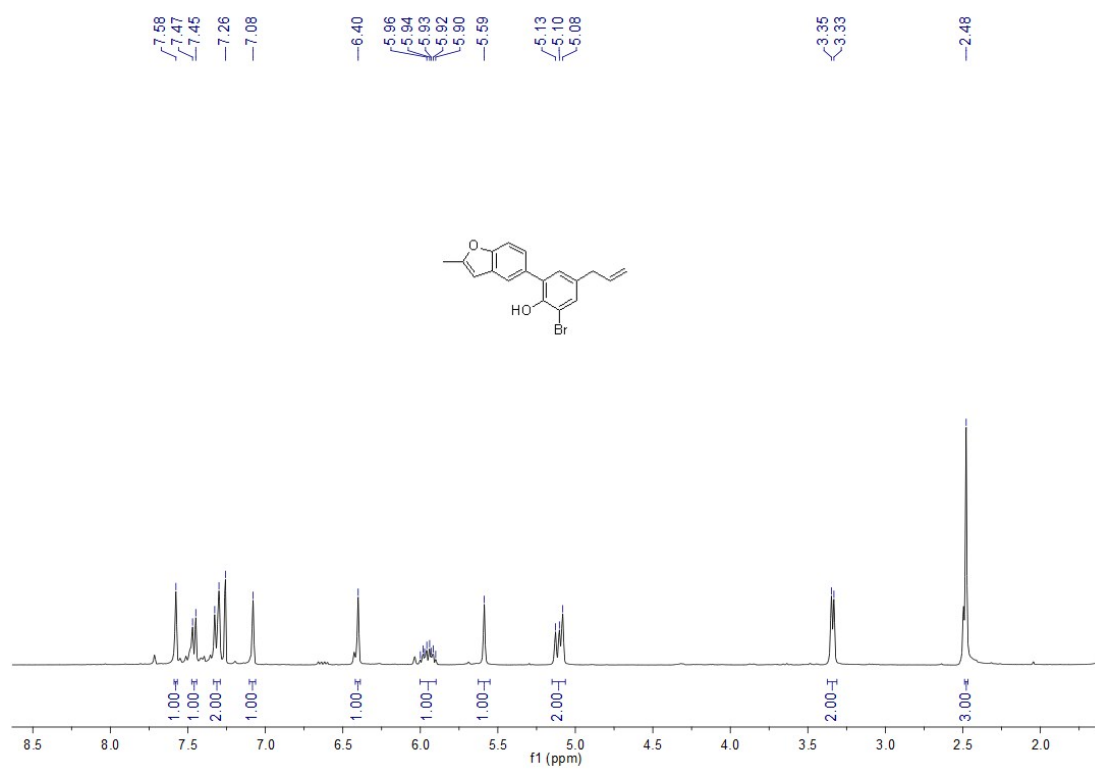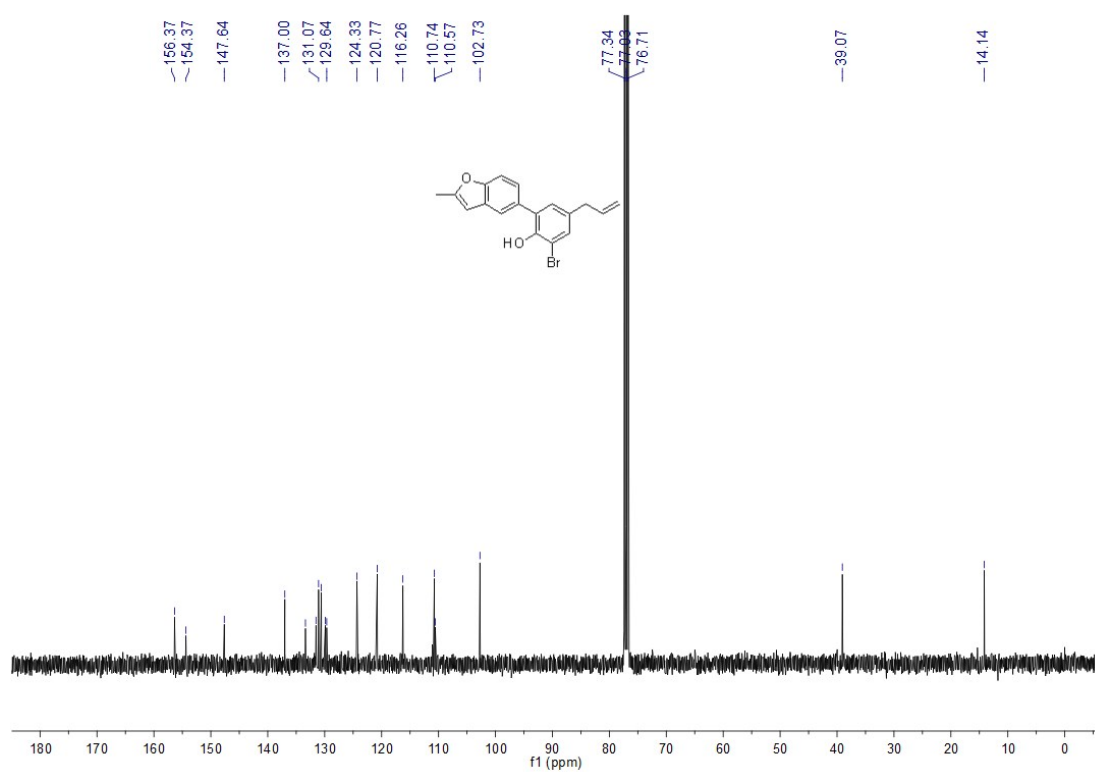



The  $^1\text{H}$  NMR (400MHz,  $\text{CDCl}_3$ ) and  $^{13}\text{C}$  NMR (101 MHz,  $\text{CDCl}_3$ ) of compound **8**

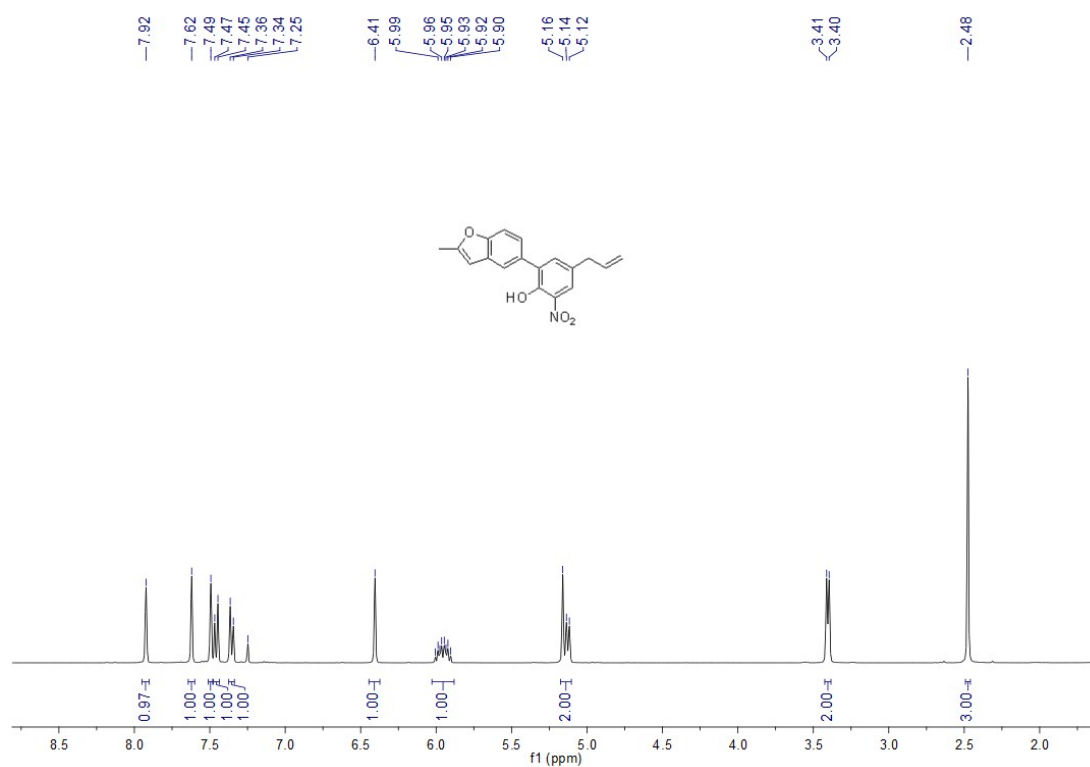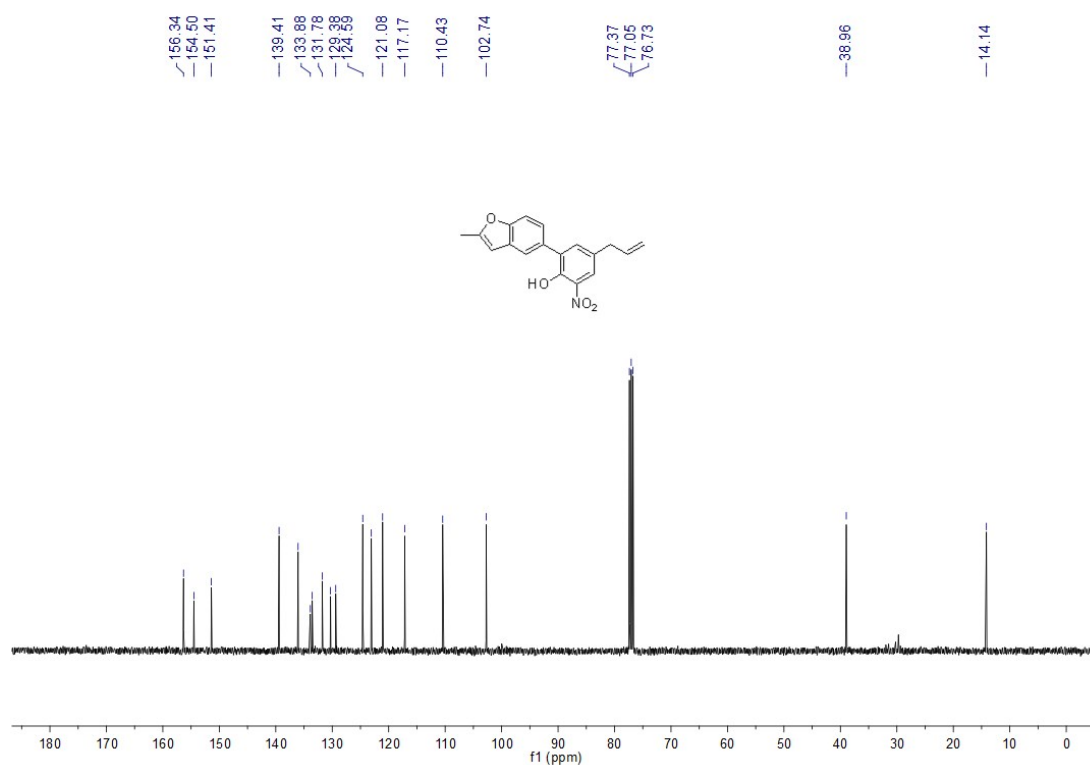

The  $^1\text{H}$  NMR (400MHz,  $\text{CDCl}_3$ ) and  $^{13}\text{C}$  NMR (101 MHz,  $\text{CDCl}_3$ ) of compound **9**

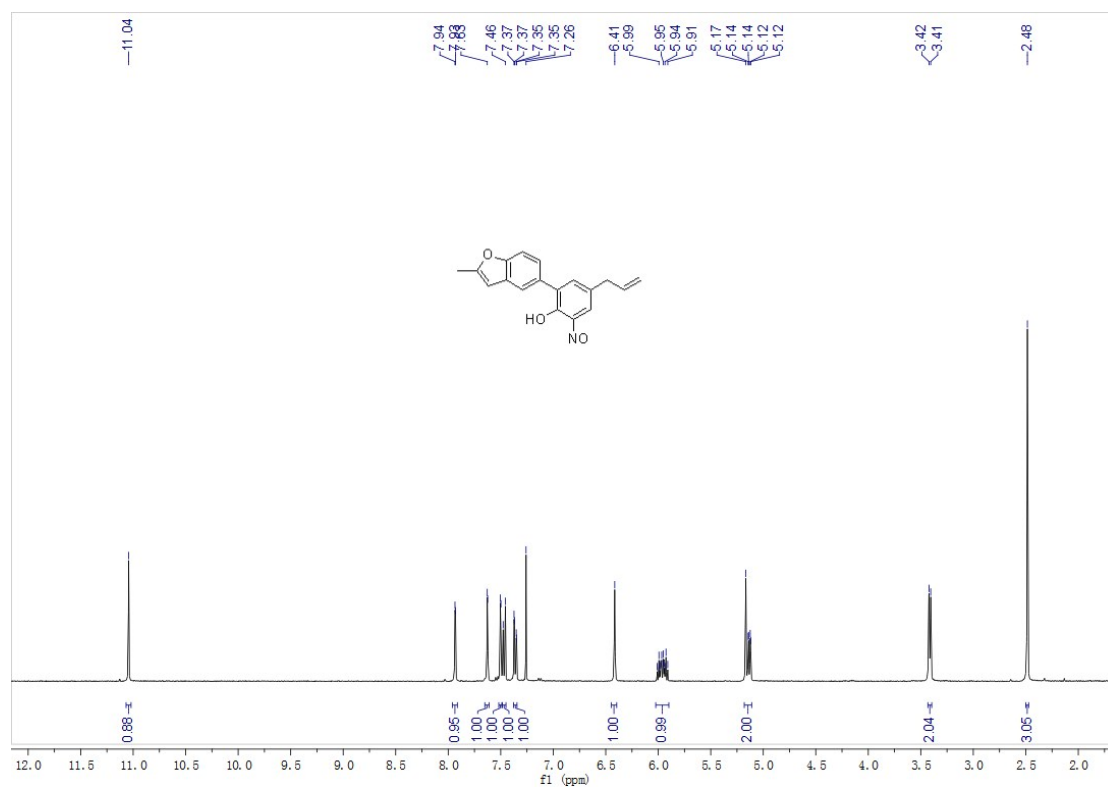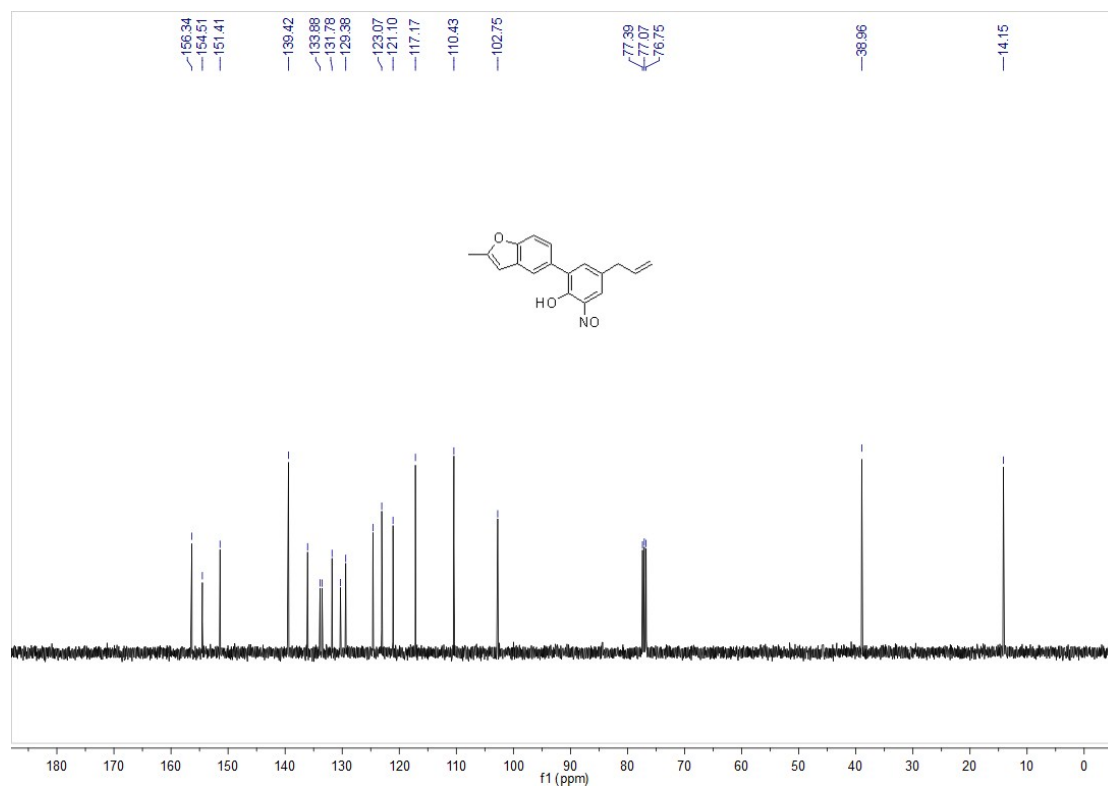

The  $^1\text{H}$  NMR (400MHz,  $\text{DMSO-d}_6$ ) and  $^{13}\text{C}$  NMR (101 MHz,  $\text{DMSO-d}_6$ ) of compound **10**

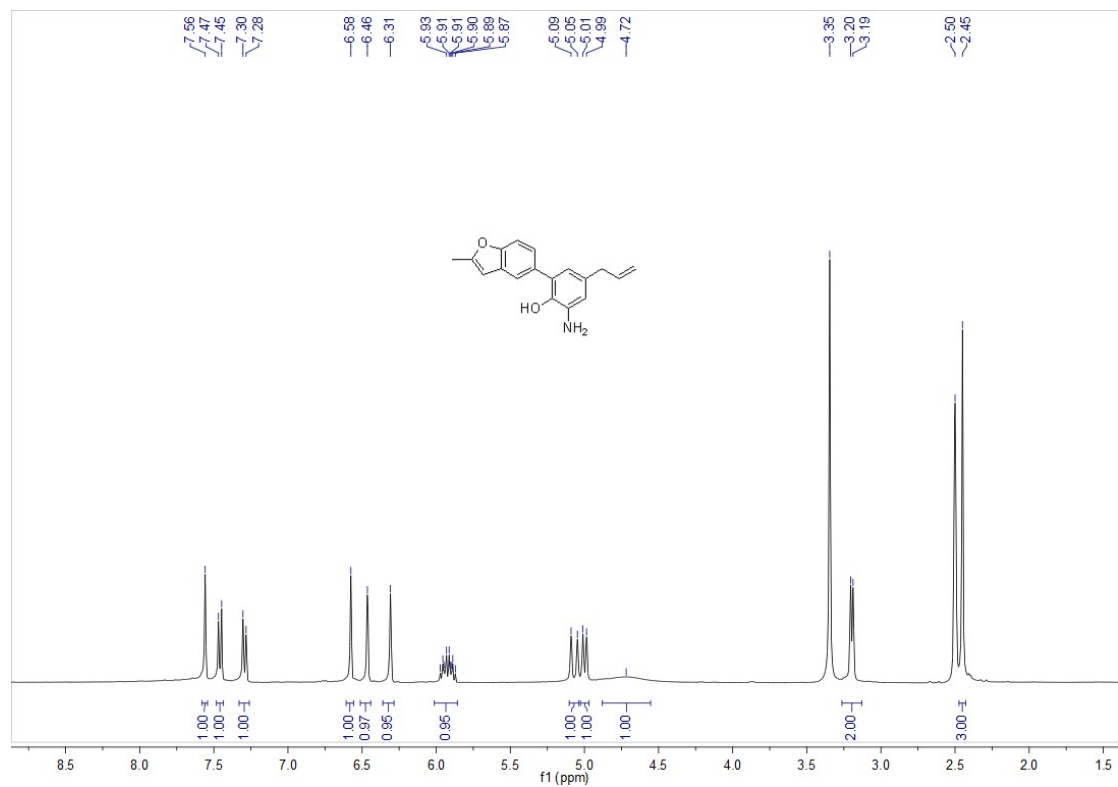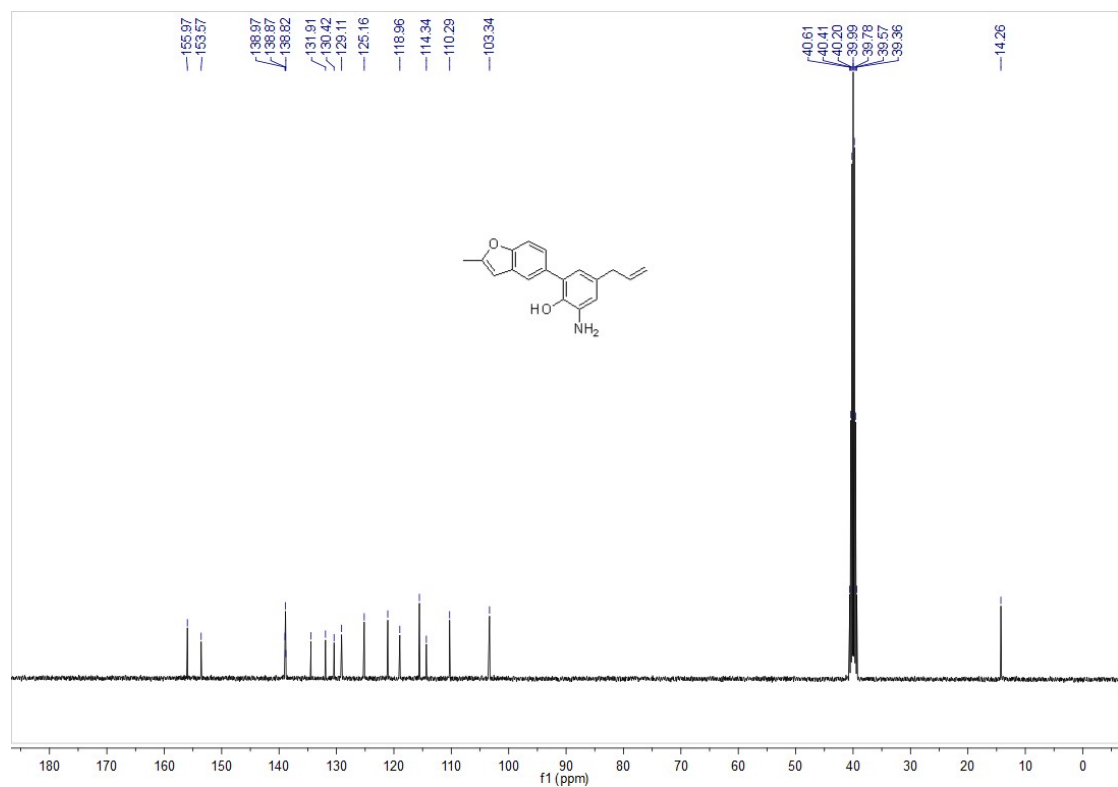

The  $^1\text{H}$  NMR (400MHz,  $\text{CDCl}_3$ ) and  $^{13}\text{C}$  NMR (101 MHz,  $\text{CDCl}_3$ ) of compound **11**

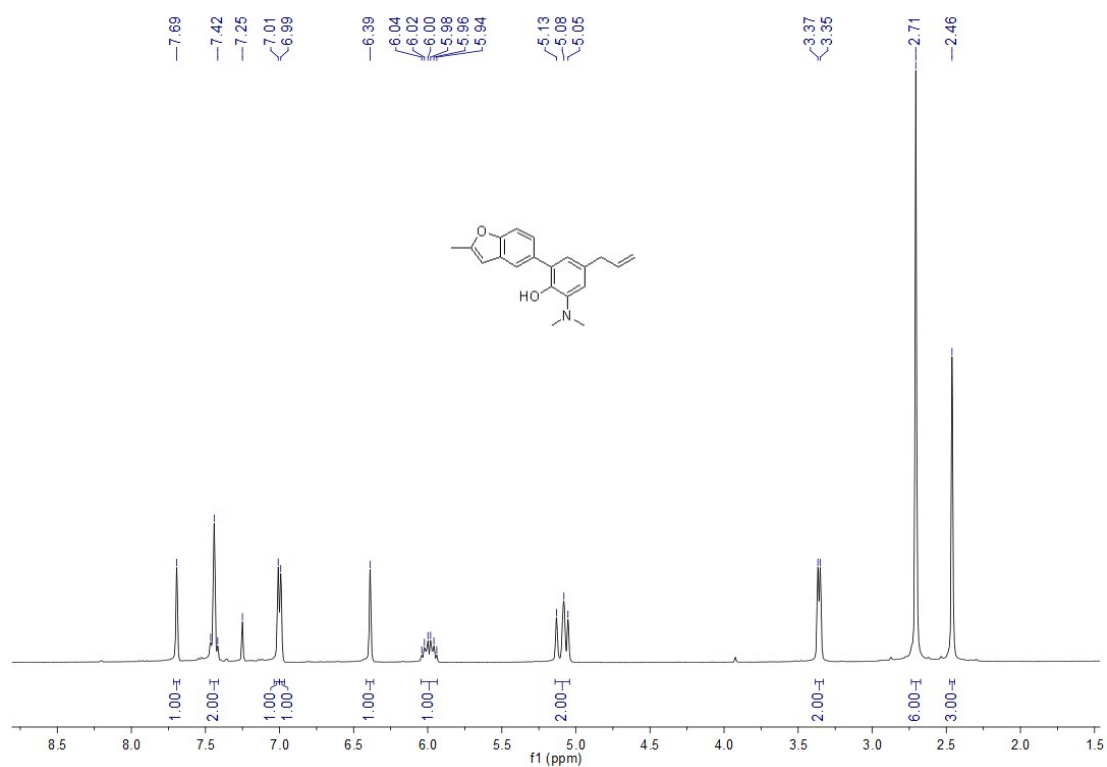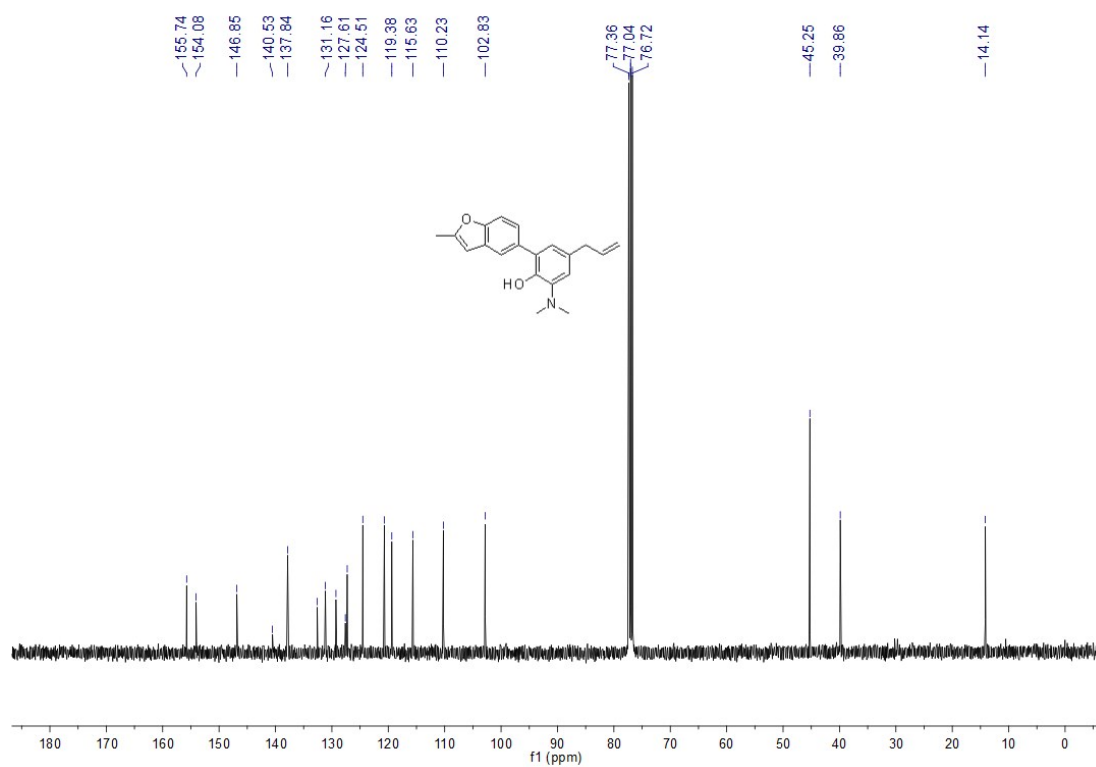

The  $^1\text{H}$  NMR (400MHz,  $\text{CDCl}_3$ ) and  $^{13}\text{C}$  NMR (101 MHz,  $\text{CDCl}_3$ ) of compound **12**

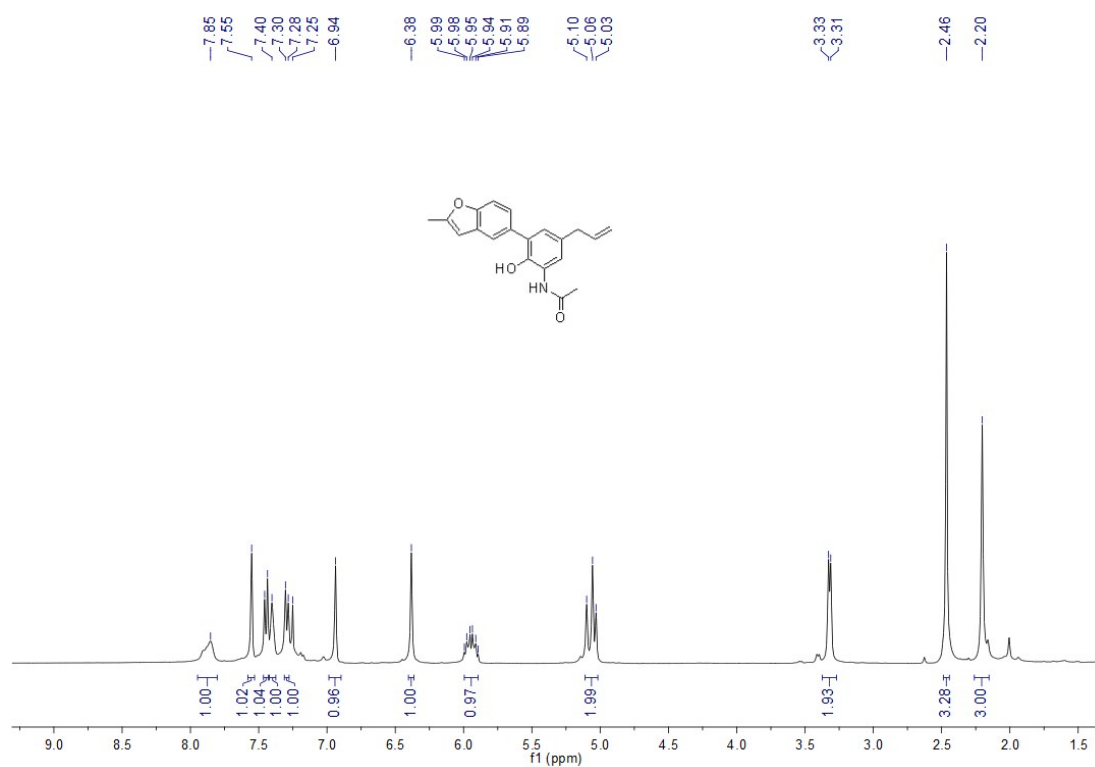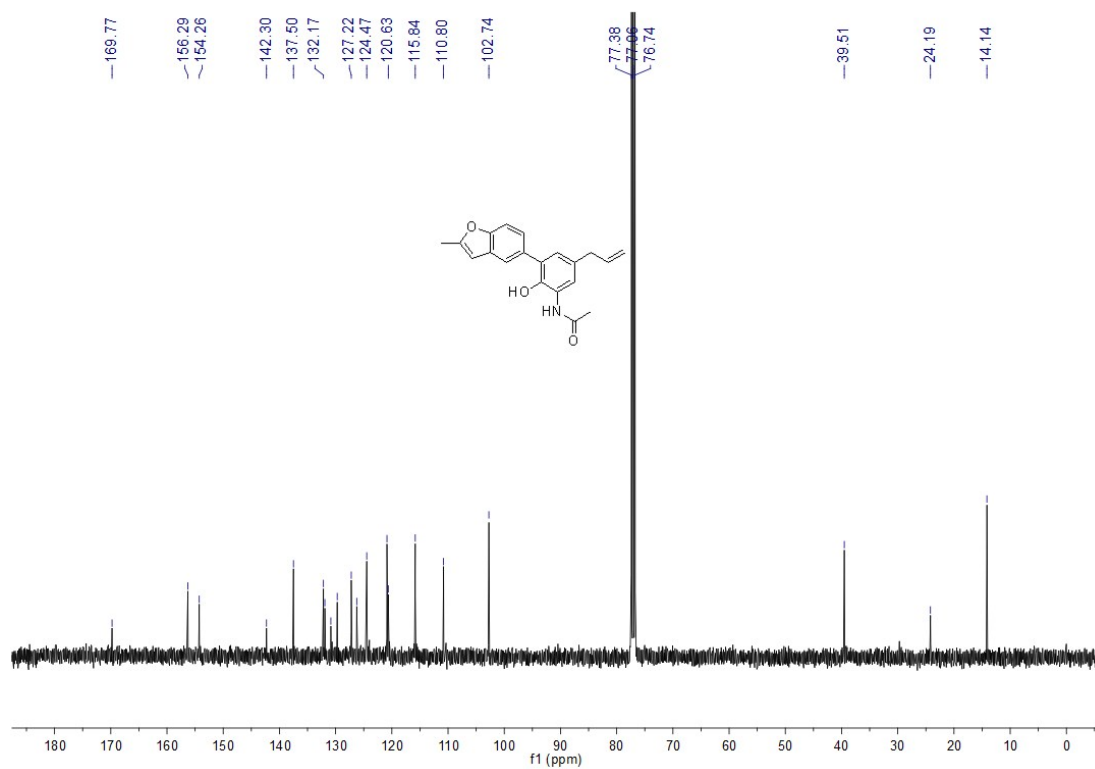

The  $^1\text{H}$  NMR (400MHz,  $\text{CDCl}_3$ ) and  $^{13}\text{C}$  NMR (101 MHz,  $\text{CDCl}_3$ ) of compound **13**

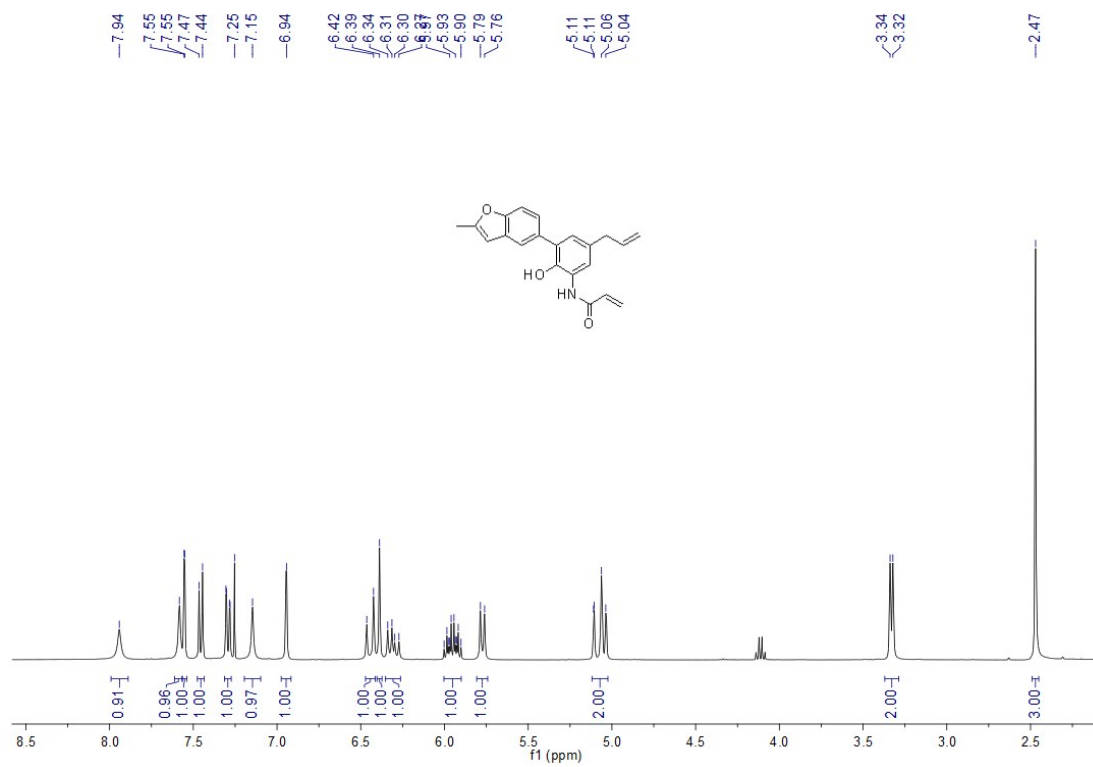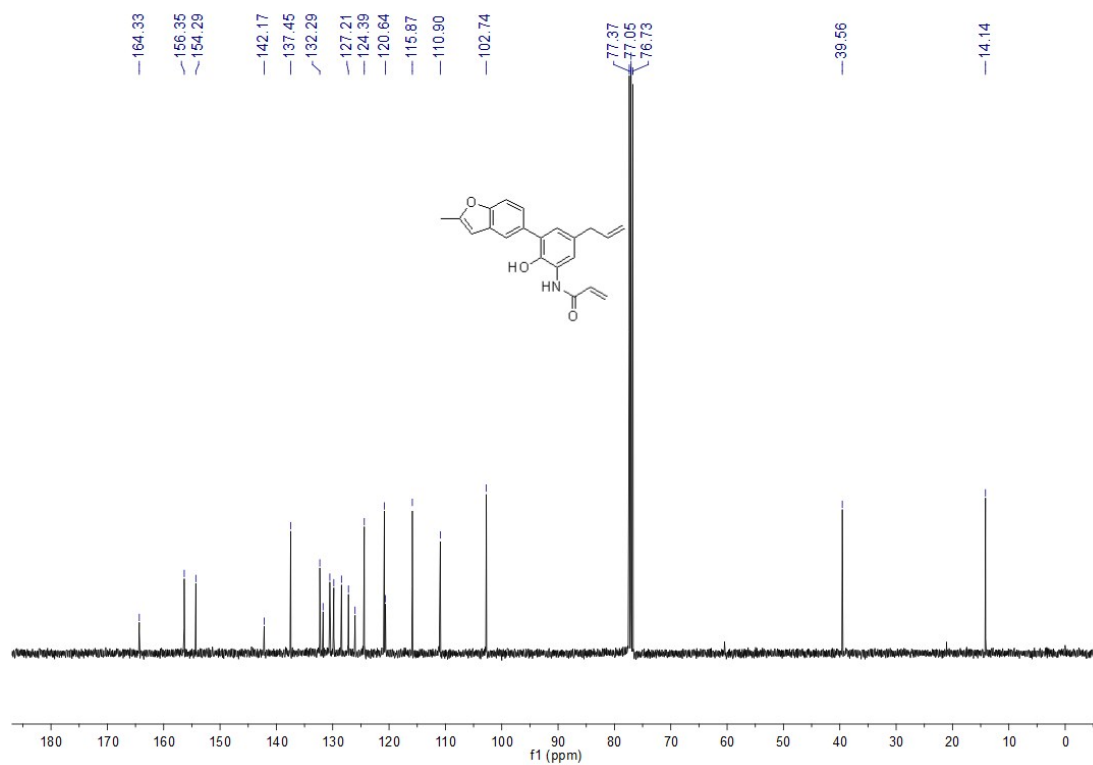

The  $^1\text{H}$  NMR (400MHz,  $\text{CDCl}_3$ ) and  $^{13}\text{C}$  NMR (101 MHz,  $\text{CDCl}_3$ ) of compound **14**

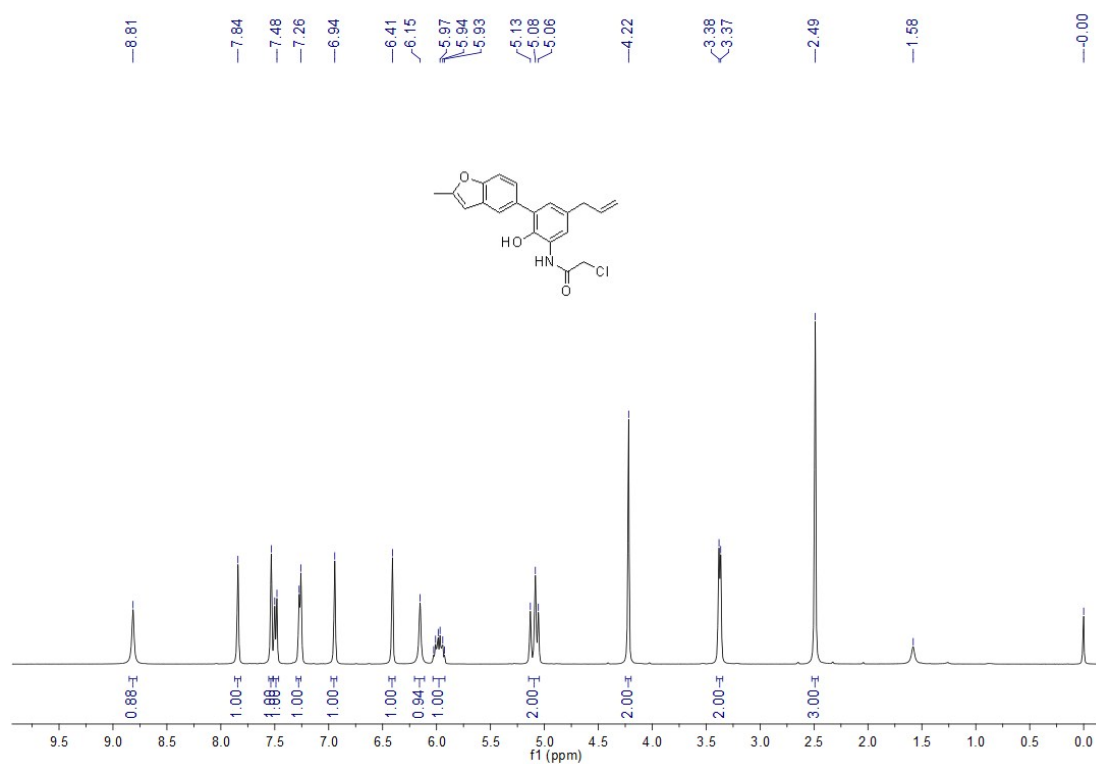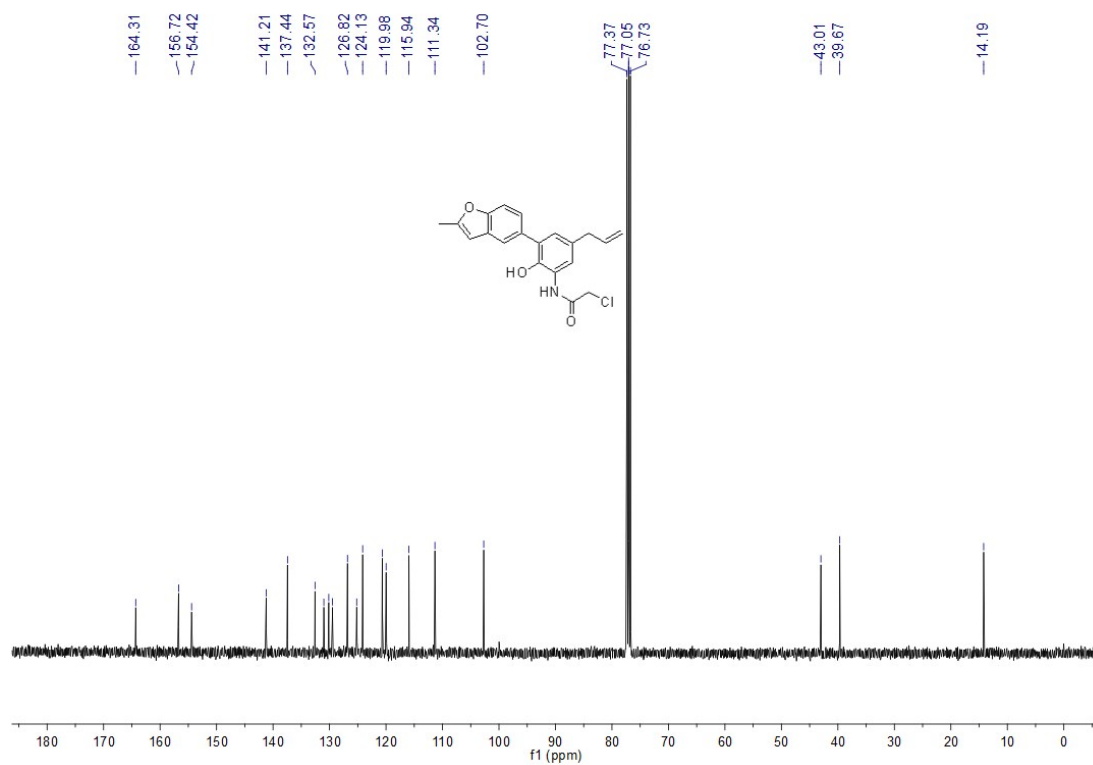

The  $^1\text{H}$  NMR (400MHz,  $\text{DMSO-}d_6$ ) and  $^{13}\text{C}$  NMR (101 MHz,  $\text{DMSO-}d_6$ ) of compound **15**

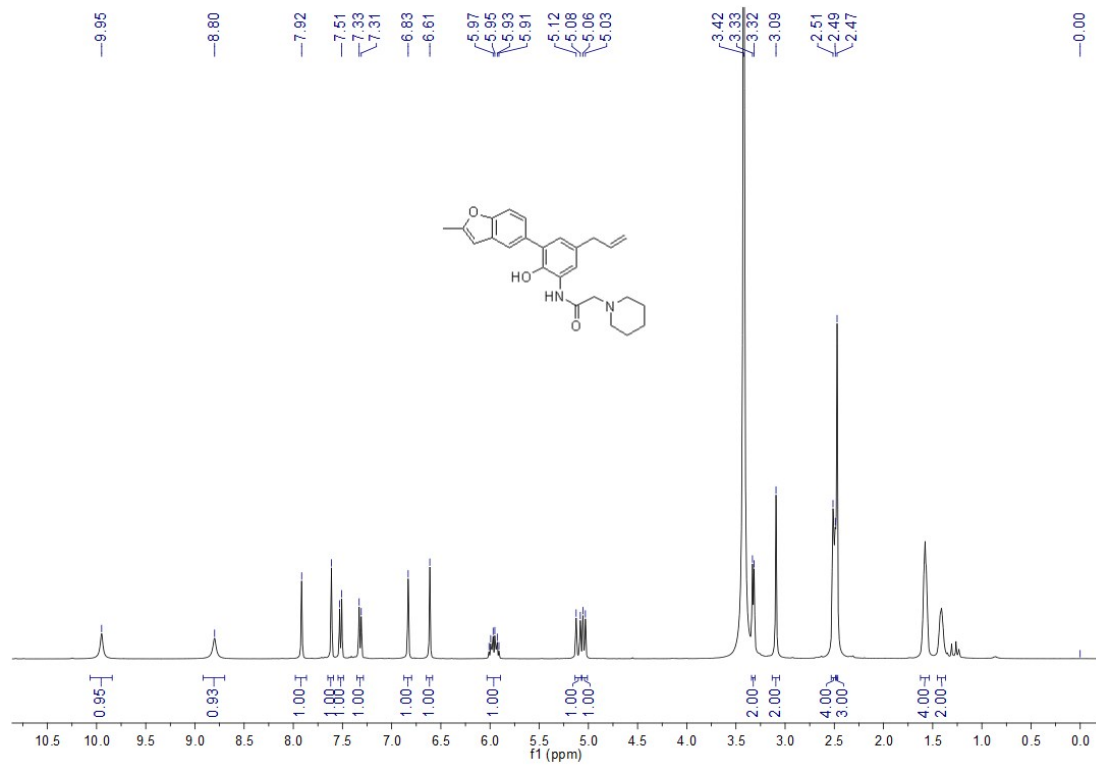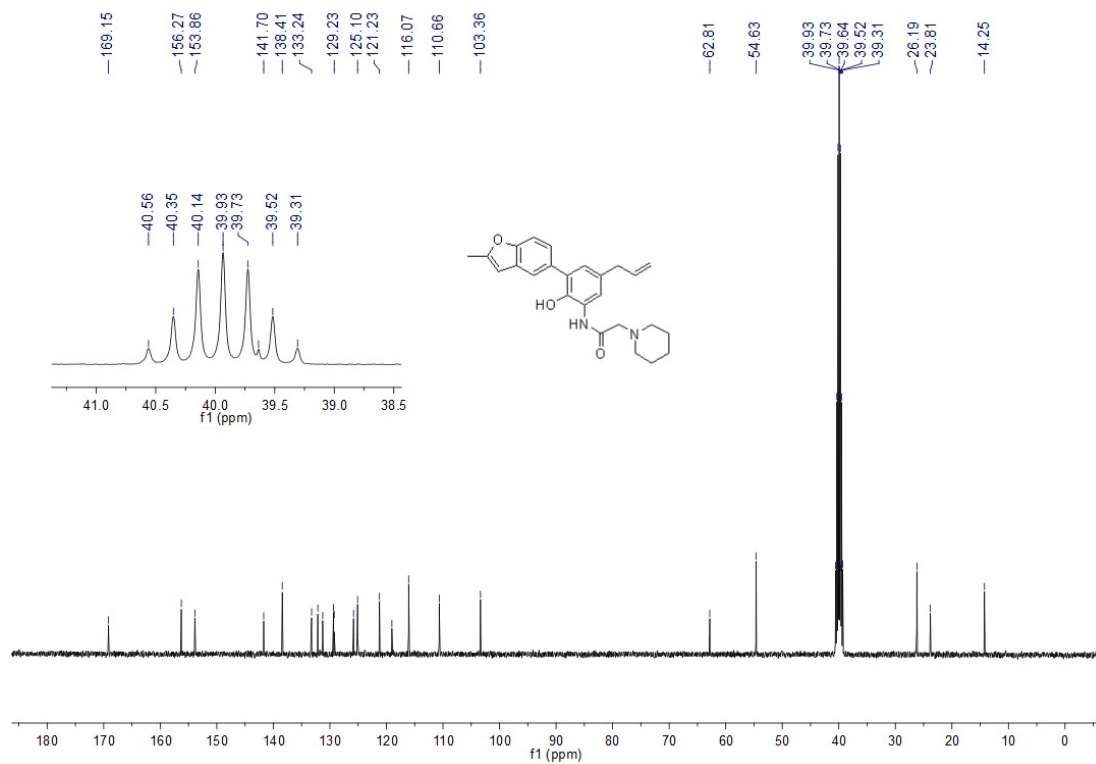



The  $^1\text{H}$  NMR (400MHz,  $\text{DMSO-}d_6$ ) and  $^{13}\text{C}$  NMR (101 MHz,  $\text{DMSO-}d_6$ ) of compound **16**

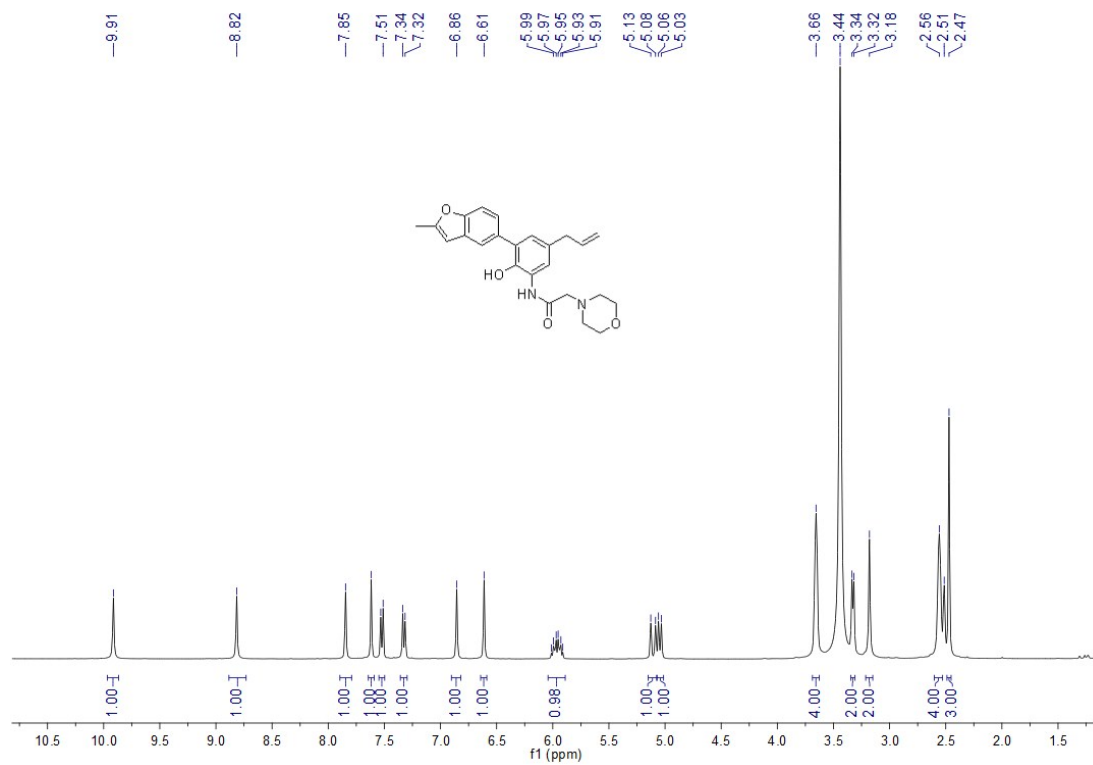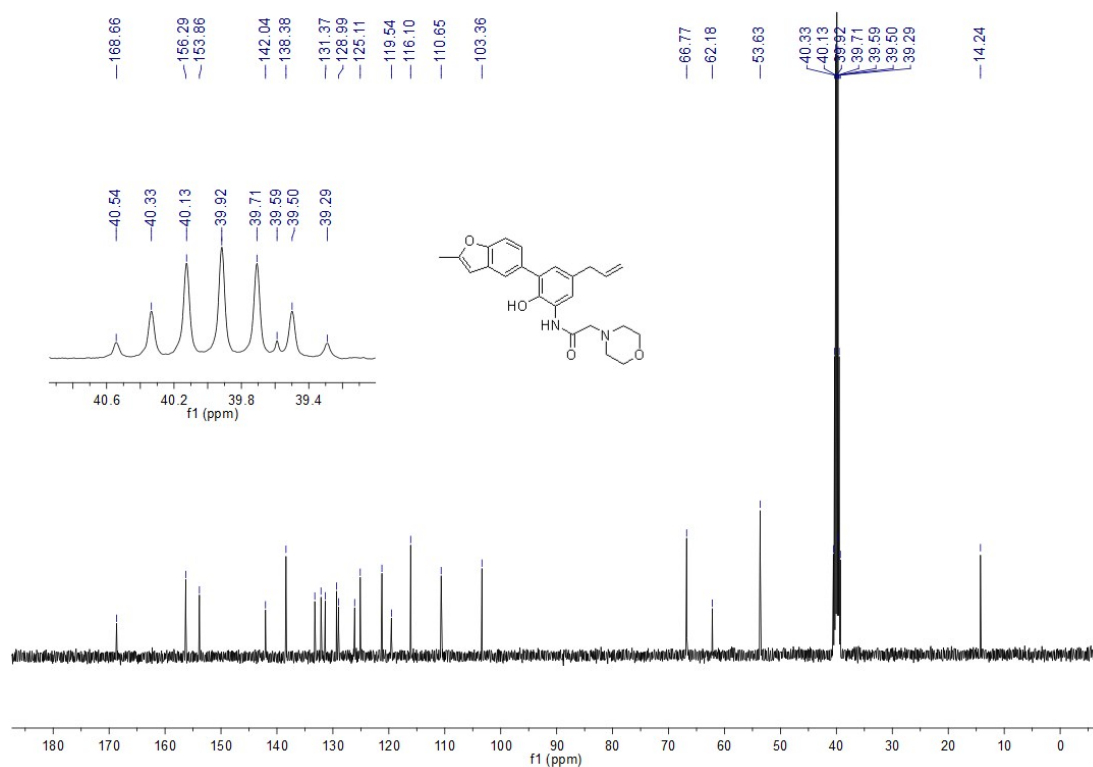

The  $^1\text{H}$  NMR (400MHz,  $\text{DMSO-}d_6$ ) and  $^{13}\text{C}$  NMR (101 MHz,  $\text{DMSO-}d_6$ ) of compound **17**

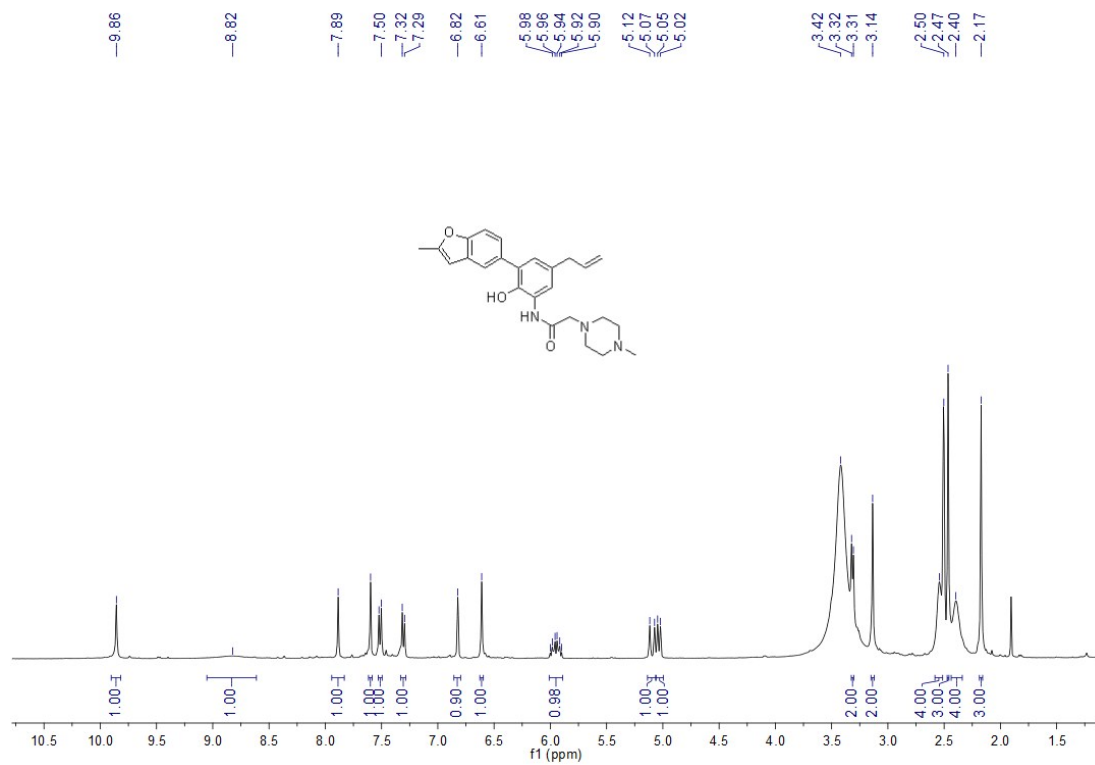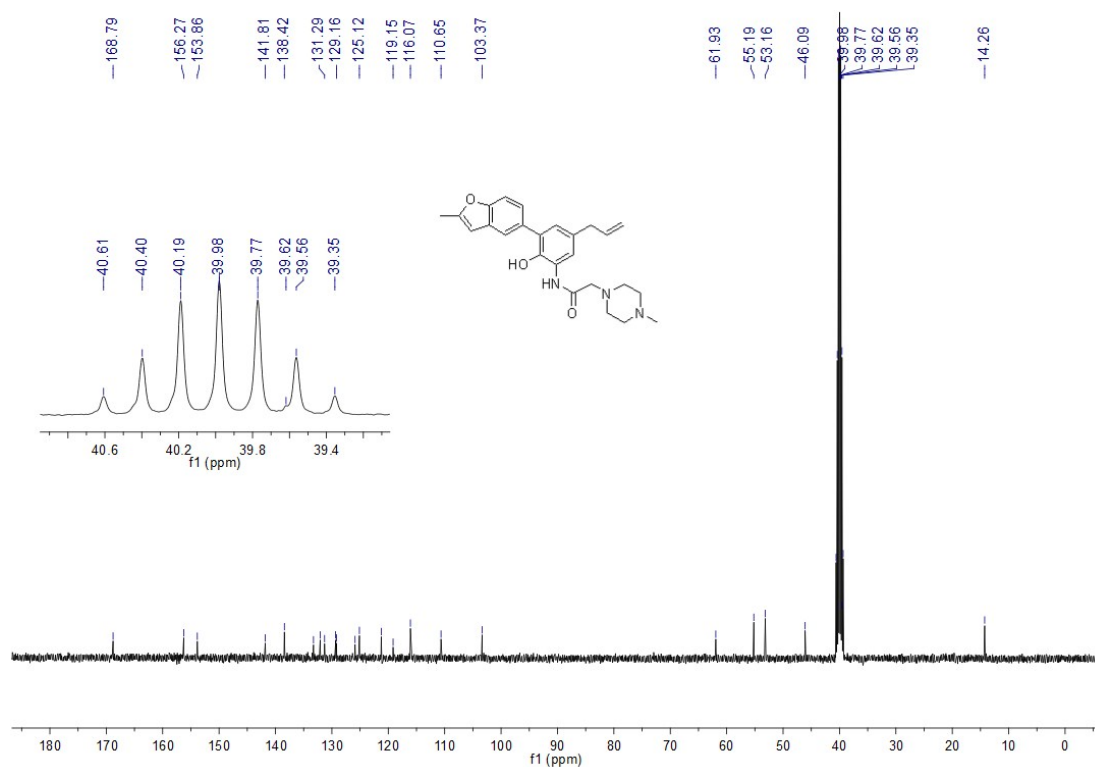

The  $^1\text{H}$  NMR (400MHz,  $\text{DMSO-}d_6$ ) and  $^{13}\text{C}$  NMR (101 MHz,  $\text{DMSO-}d_6$ ) of compound **18**

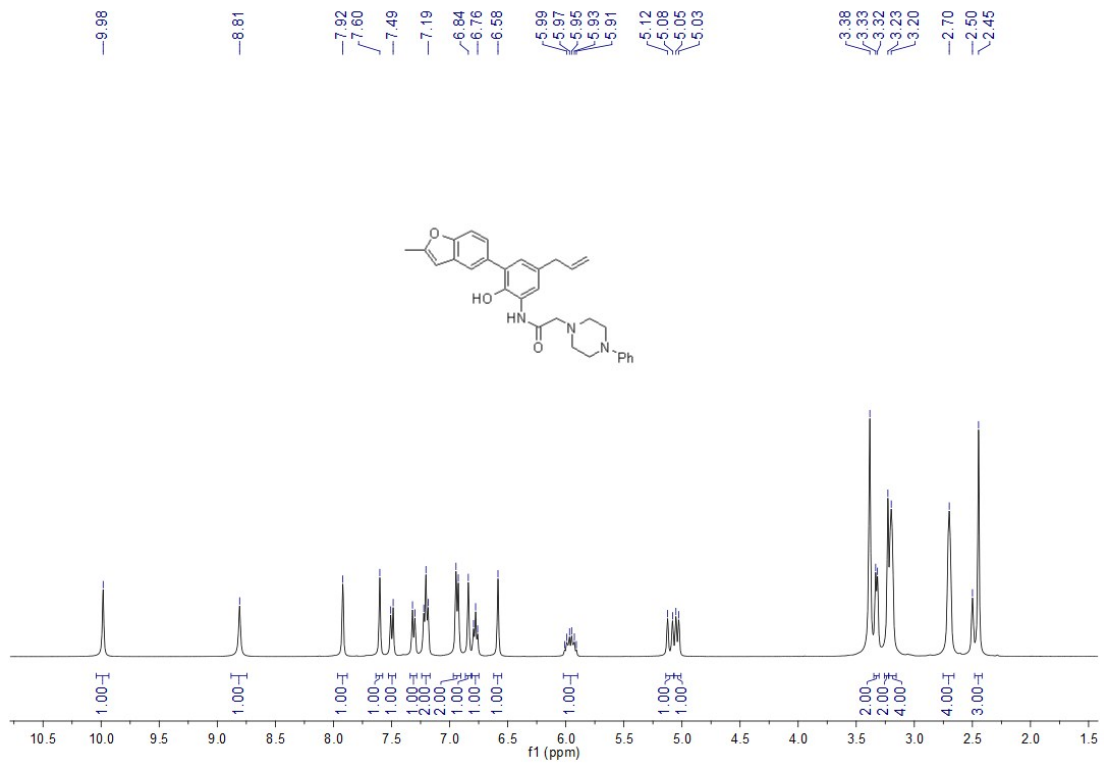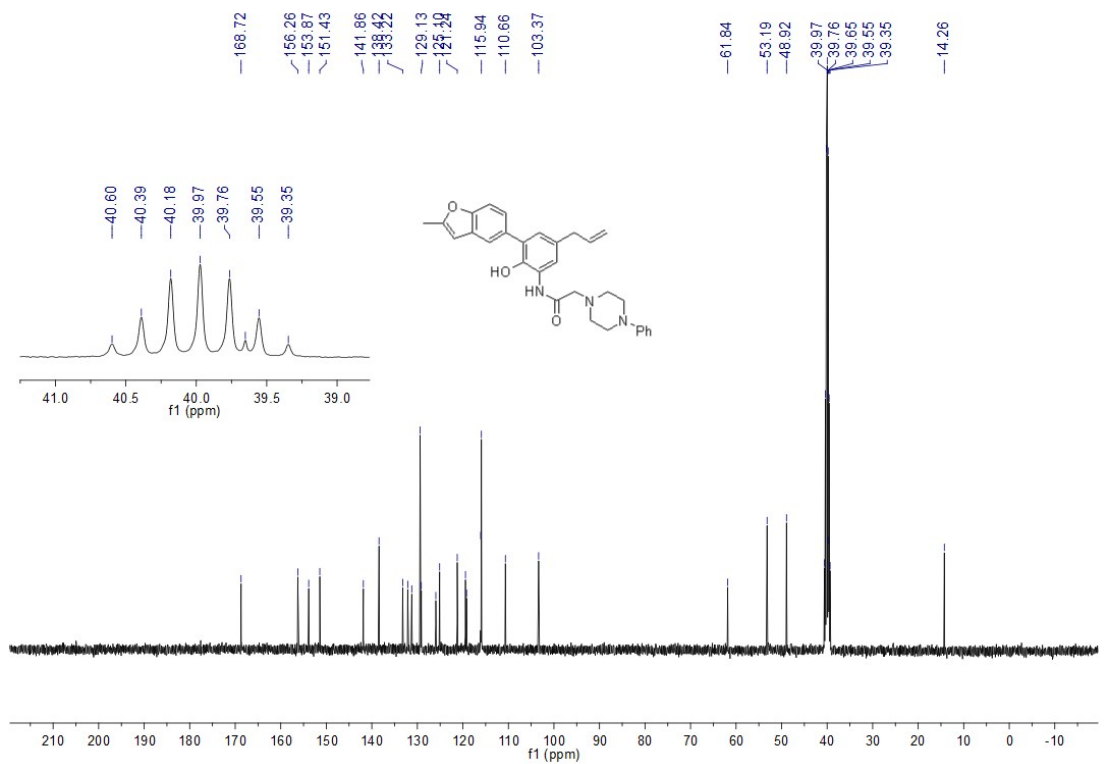

The  $^1\text{H}$  NMR (400MHz,  $\text{DMSO-}d_6$ ) and  $^{13}\text{C}$  NMR (101 MHz,  $\text{DMSO-}d_6$ ) of compound **19**

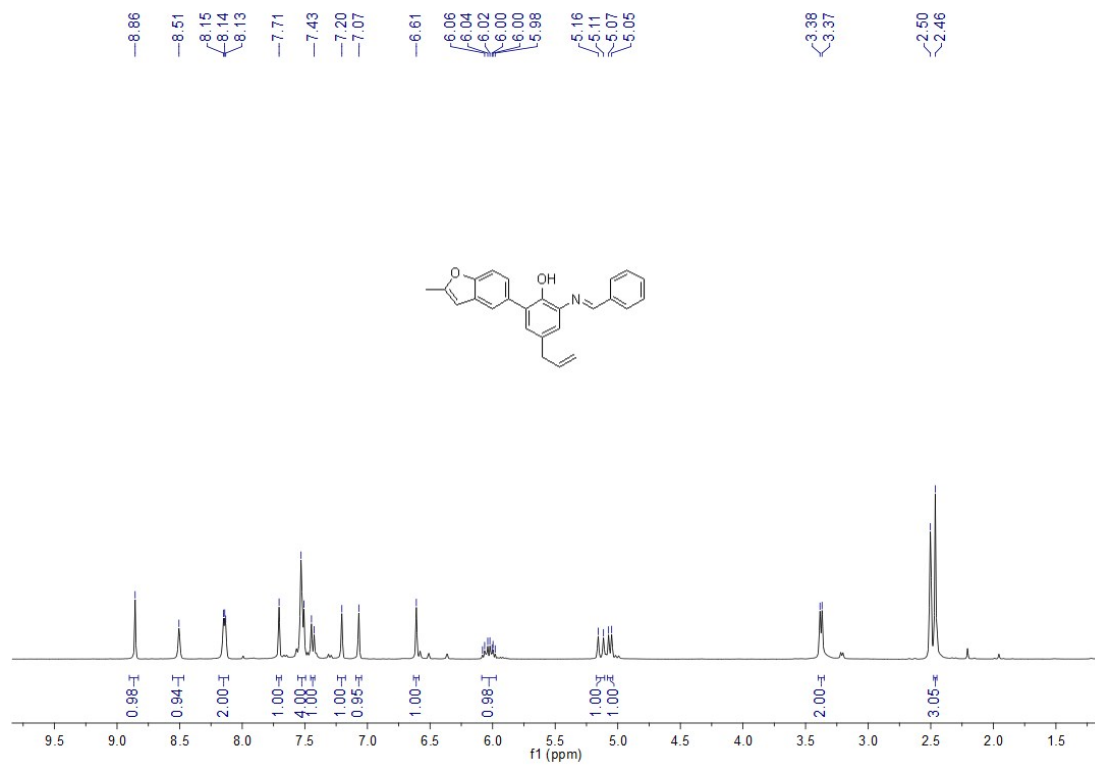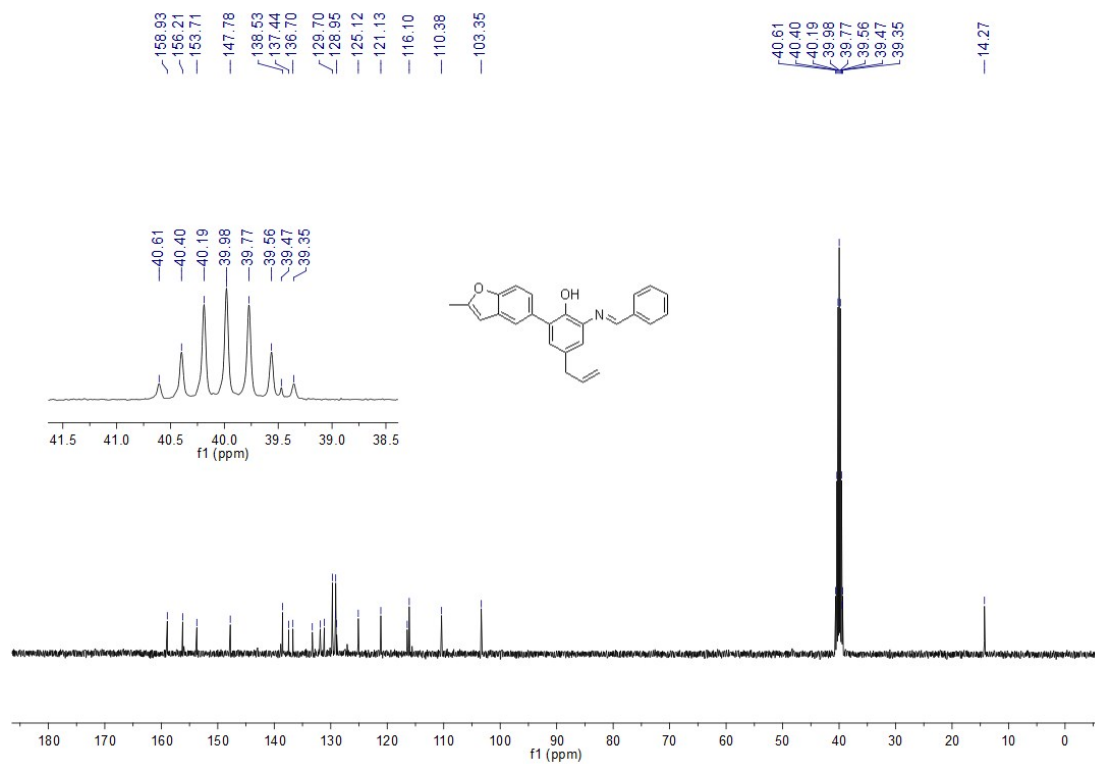

The  $^1\text{H}$  NMR (400MHz,  $\text{CDCl}_3$ ) and  $^{13}\text{C}$  NMR (101 MHz,  $\text{CDCl}_3$ ) of compound **20**

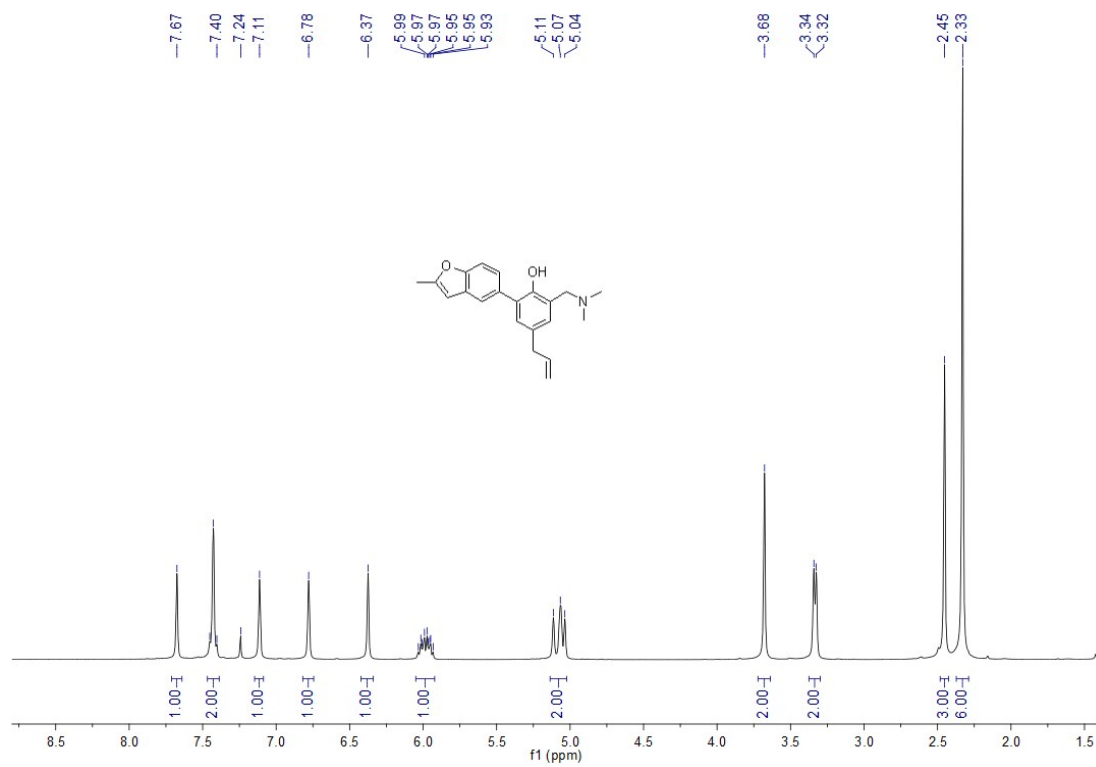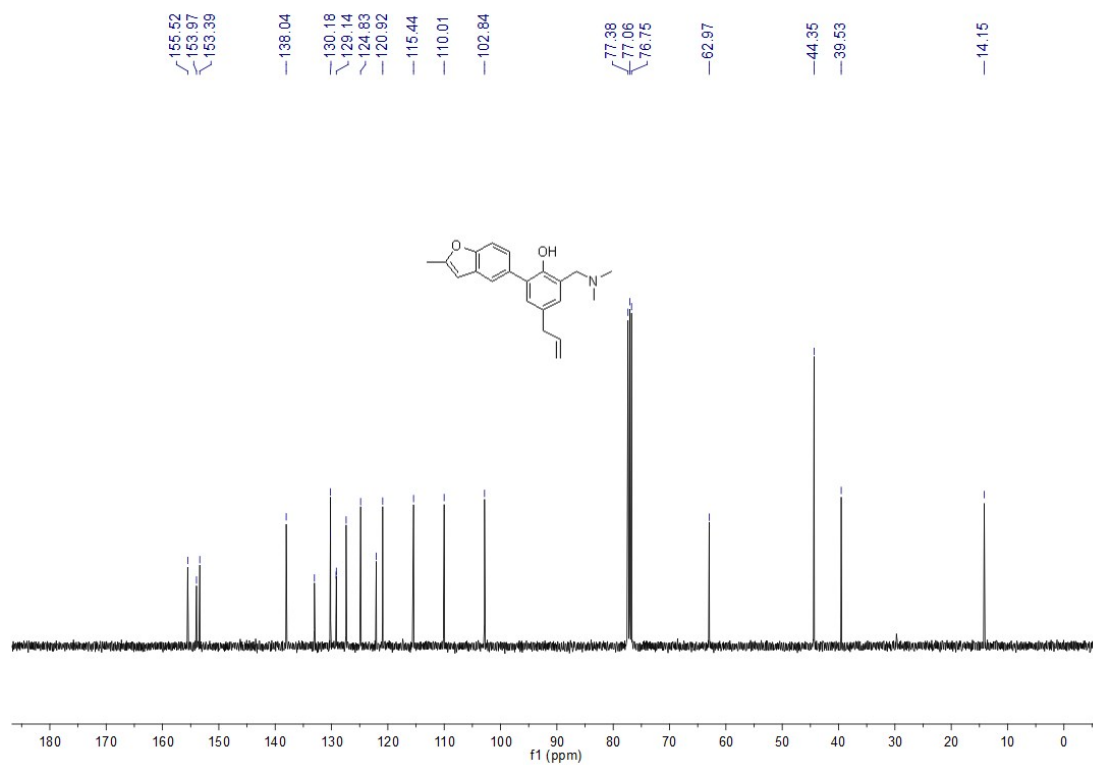

The  $^1\text{H}$  NMR (400MHz,  $\text{CDCl}_3$ ) and  $^{13}\text{C}$  NMR (101 MHz,  $\text{CDCl}_3$ ) of compound **21**

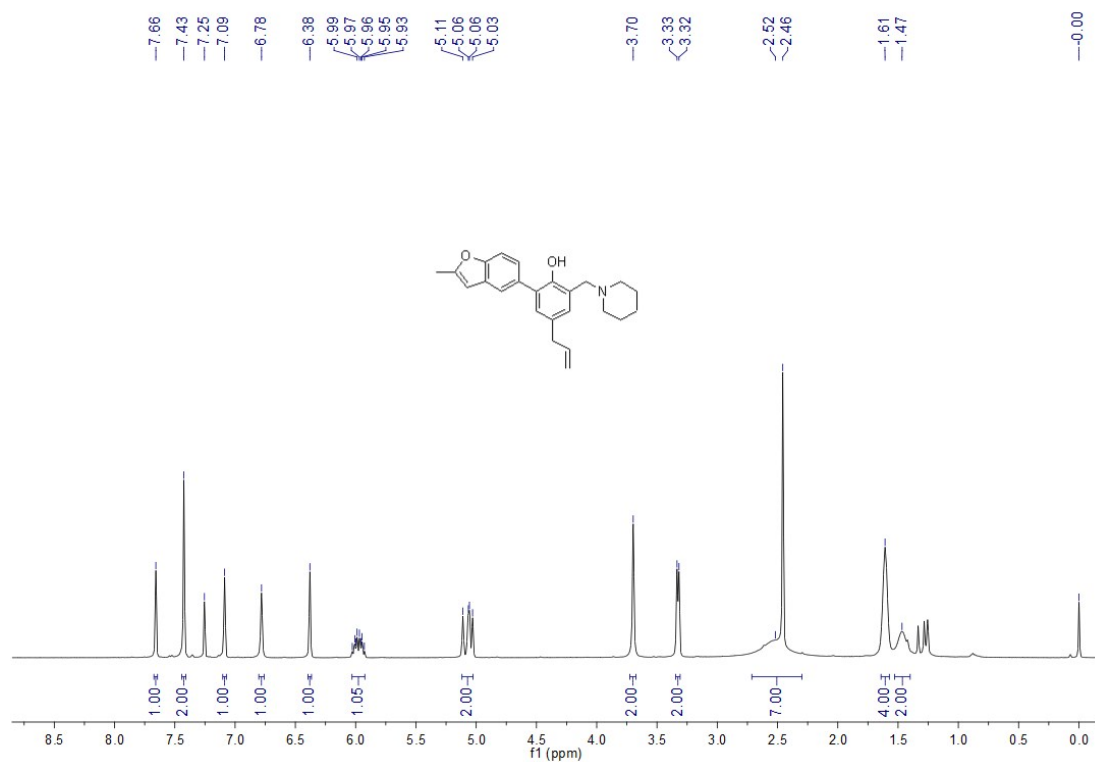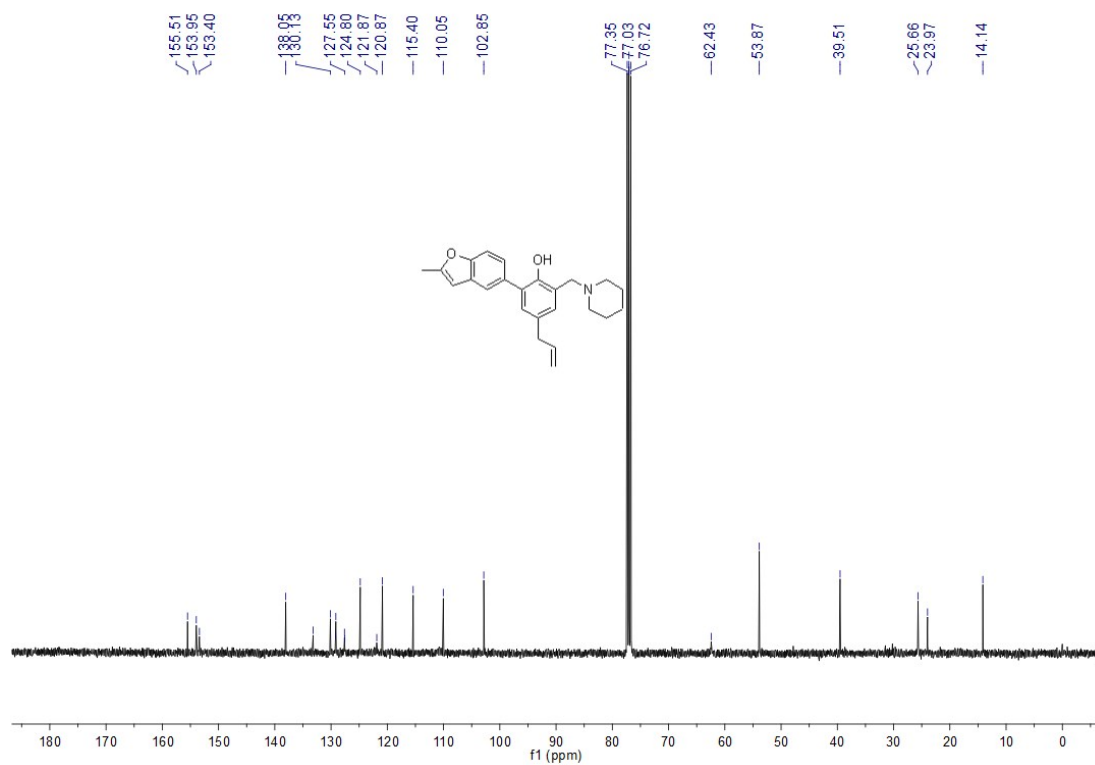

The  $^1\text{H}$  NMR (400MHz,  $\text{CDCl}_3$ ) and  $^{13}\text{C}$  NMR (101 MHz,  $\text{CDCl}_3$ ) of compound **22**

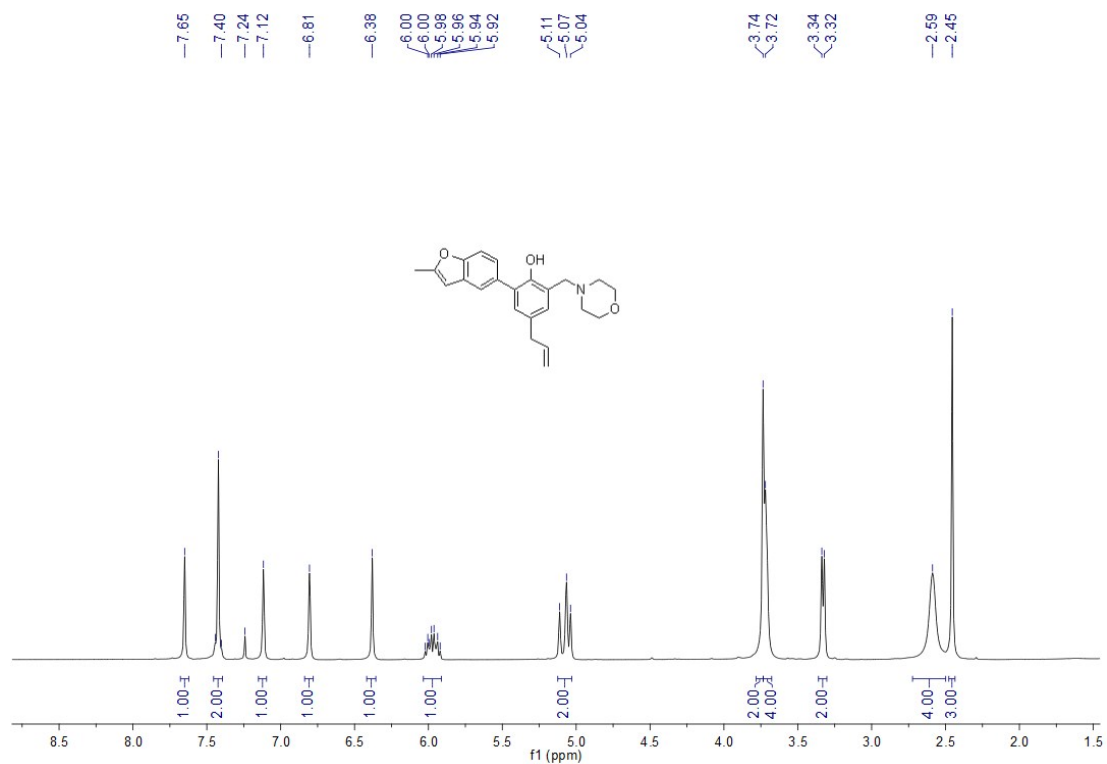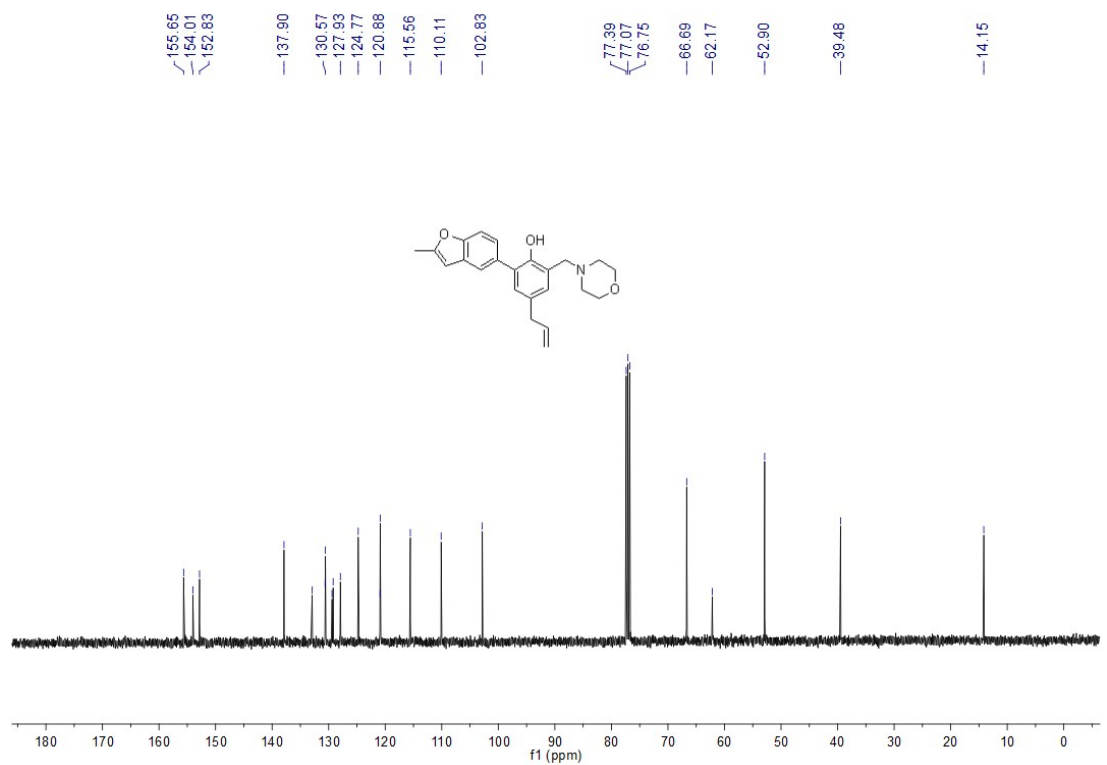

The  $^1\text{H}$  NMR (400MHz,  $\text{CDCl}_3$ ) and  $^{13}\text{C}$  NMR (101 MHz,  $\text{CDCl}_3$ ) of compound **23**

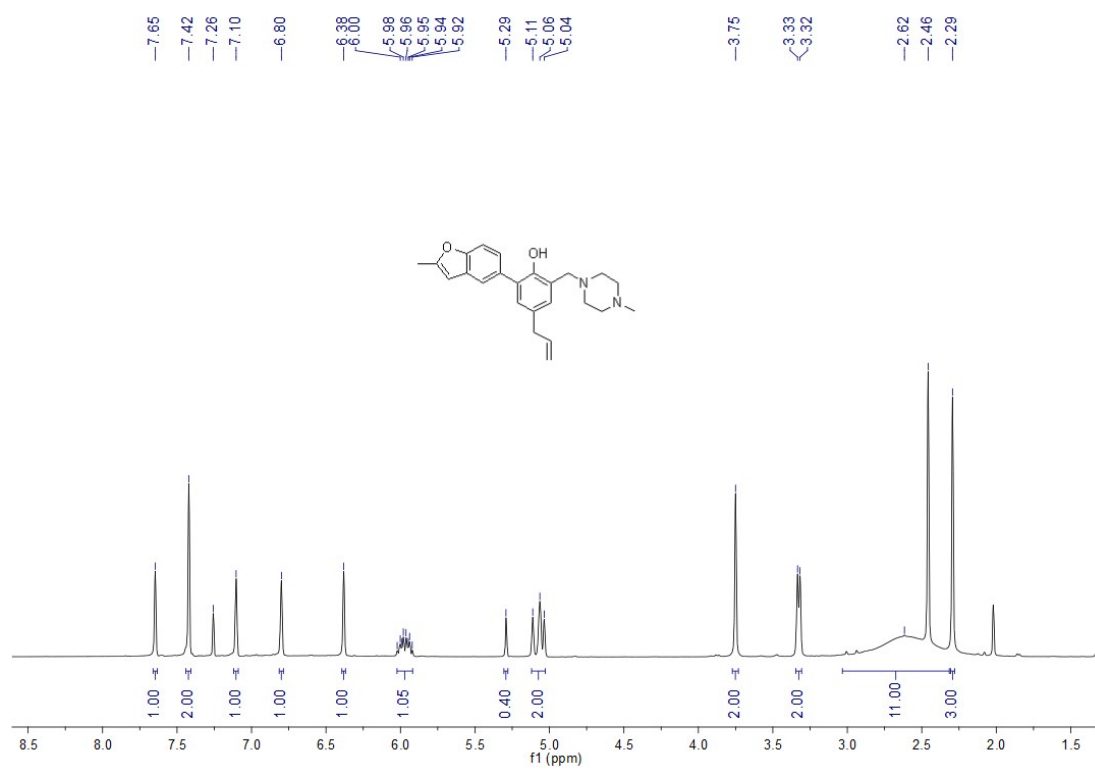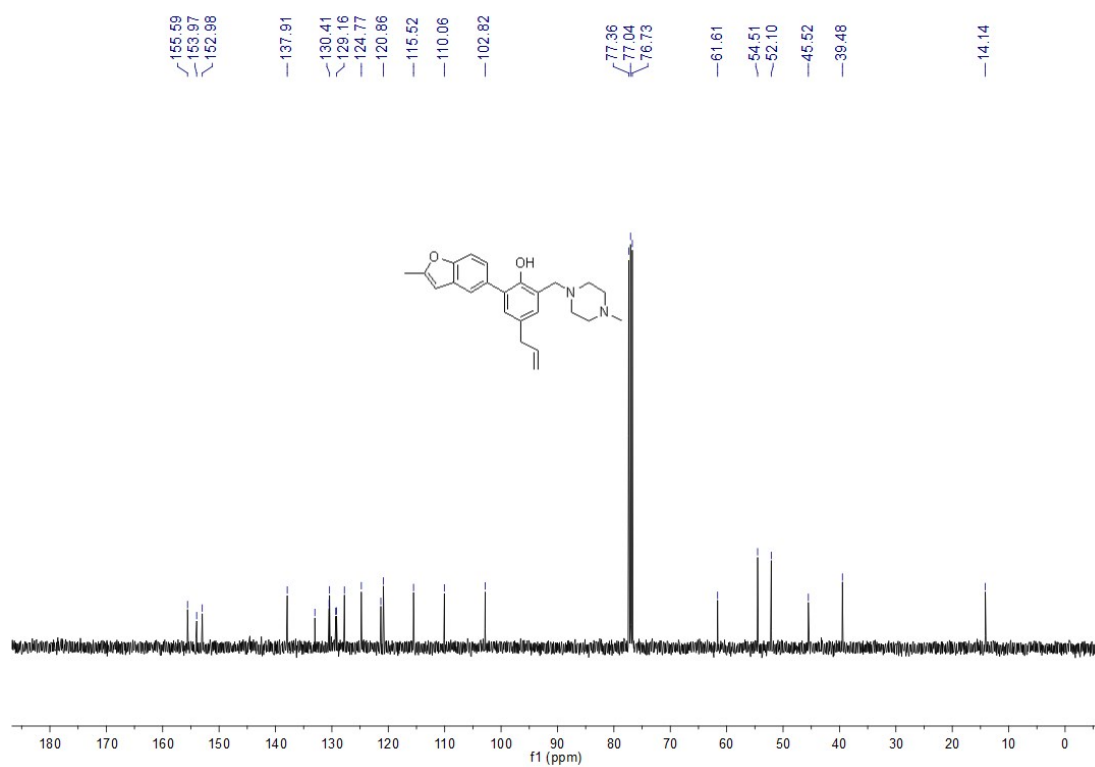



The  $^1\text{H}$  NMR (400MHz,  $\text{CDCl}_3$ ) and  $^{13}\text{C}$  NMR (101 MHz,  $\text{CDCl}_3$ ) of compound **24**

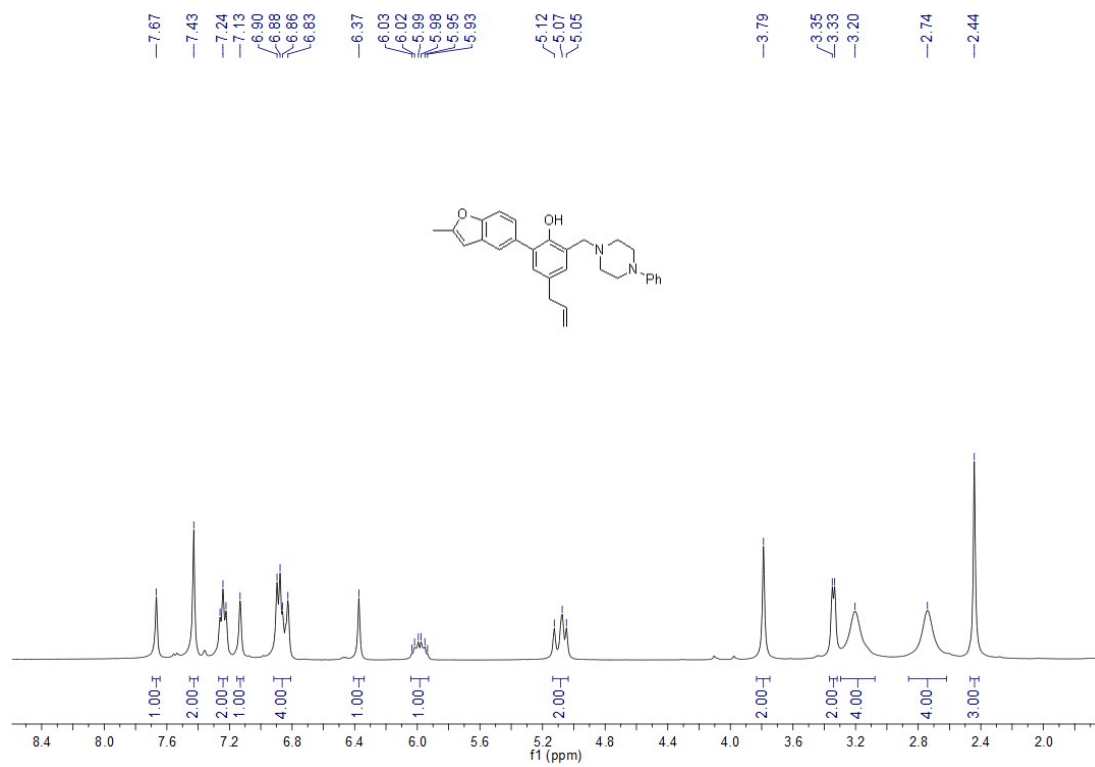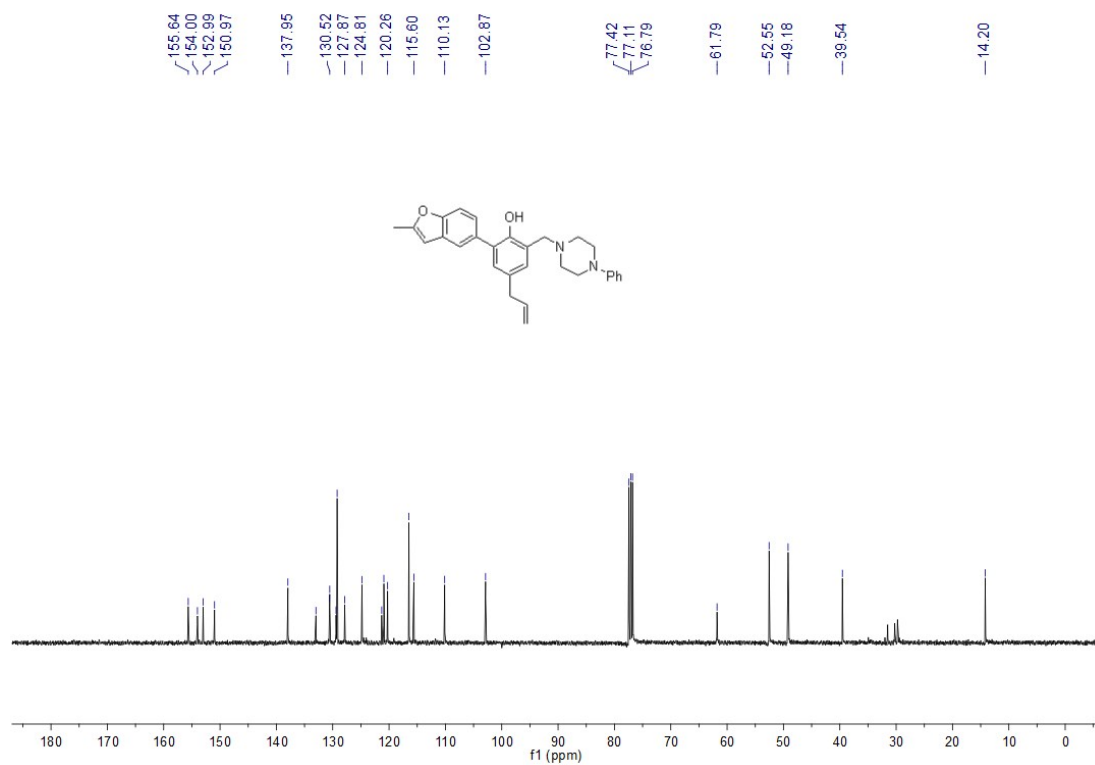

The  $^1\text{H}$  NMR (400MHz,  $\text{DMSO-}d_6$ ) and  $^{13}\text{C}$  NMR (101 MHz,  $\text{DMSO-}d_6$ ) of compound **25**

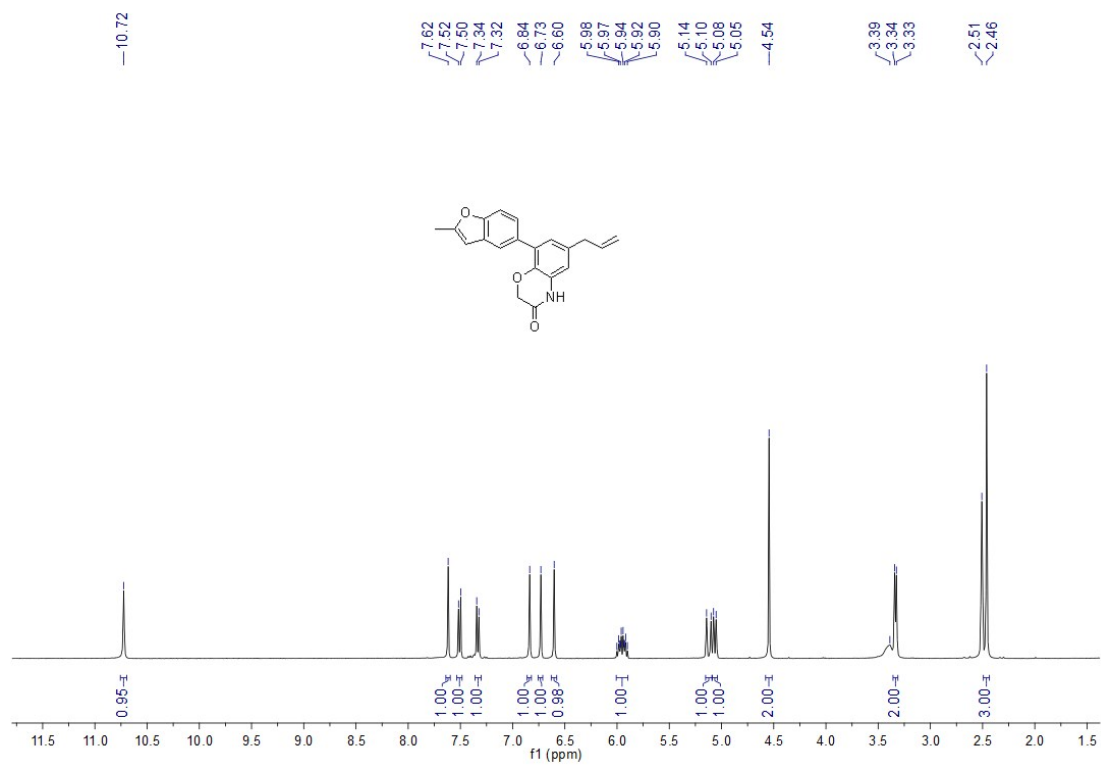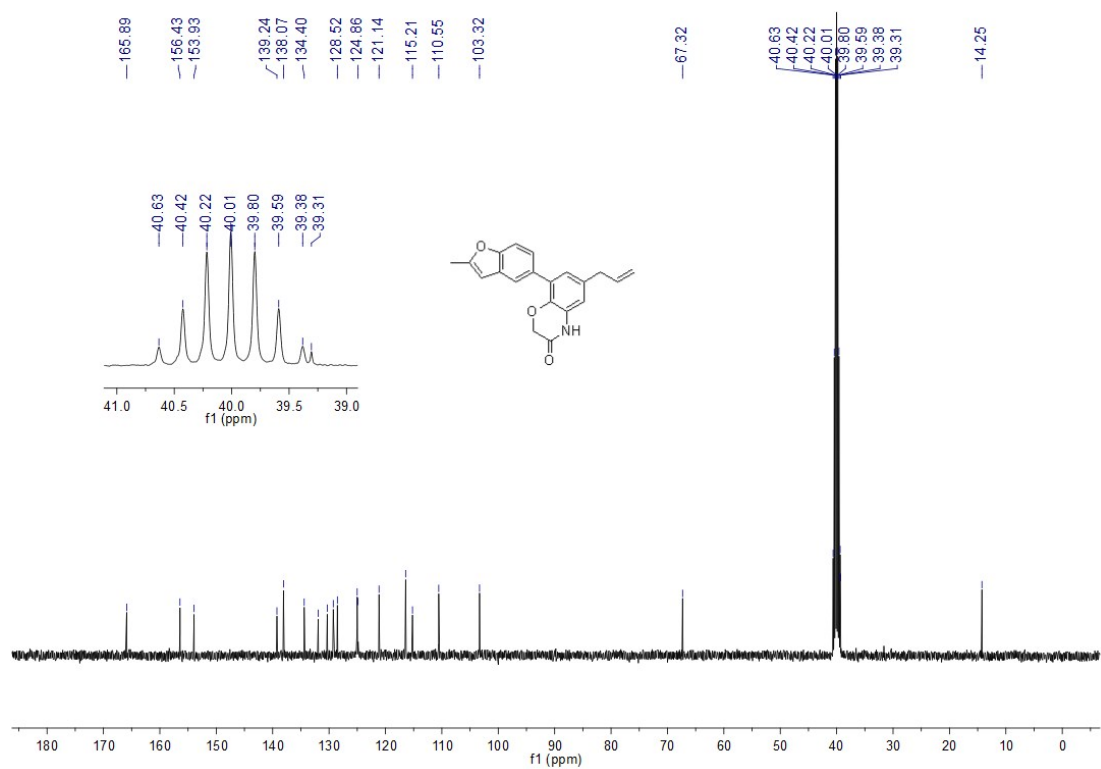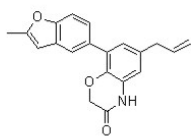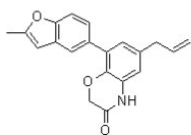

The  $^1\text{H}$  NMR (400MHz,  $\text{CDCl}_3$ ) and  $^{13}\text{C}$  NMR (101 MHz,  $\text{CDCl}_3$ ) of compound **26**

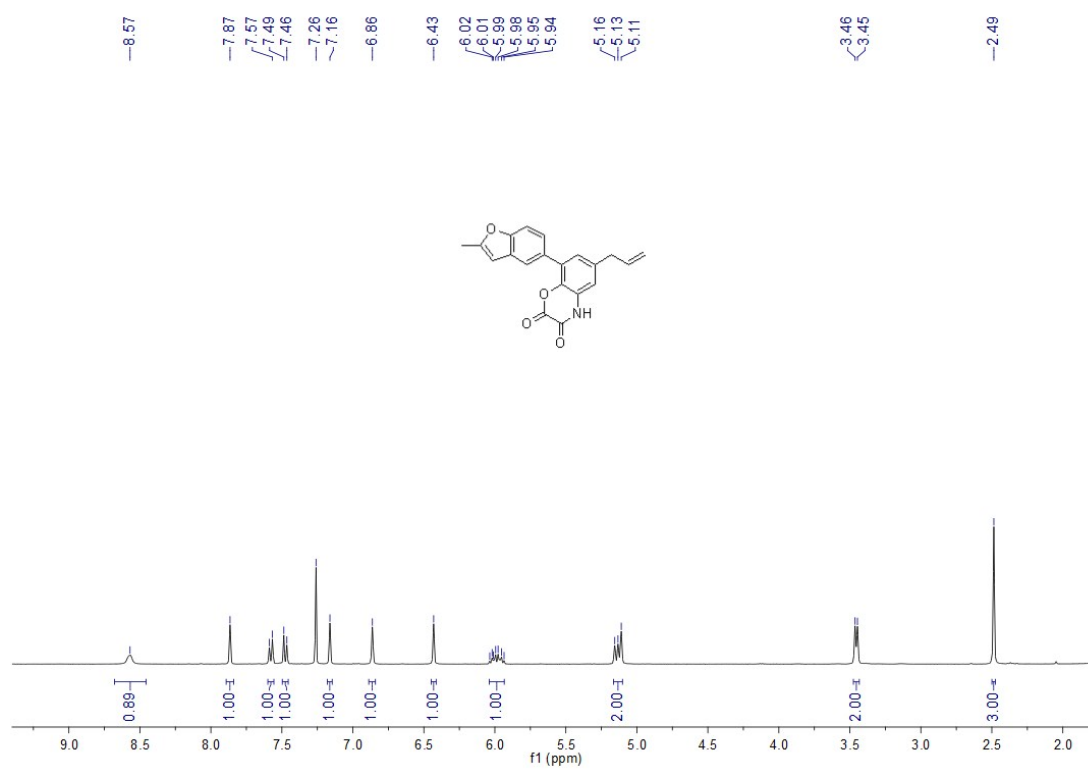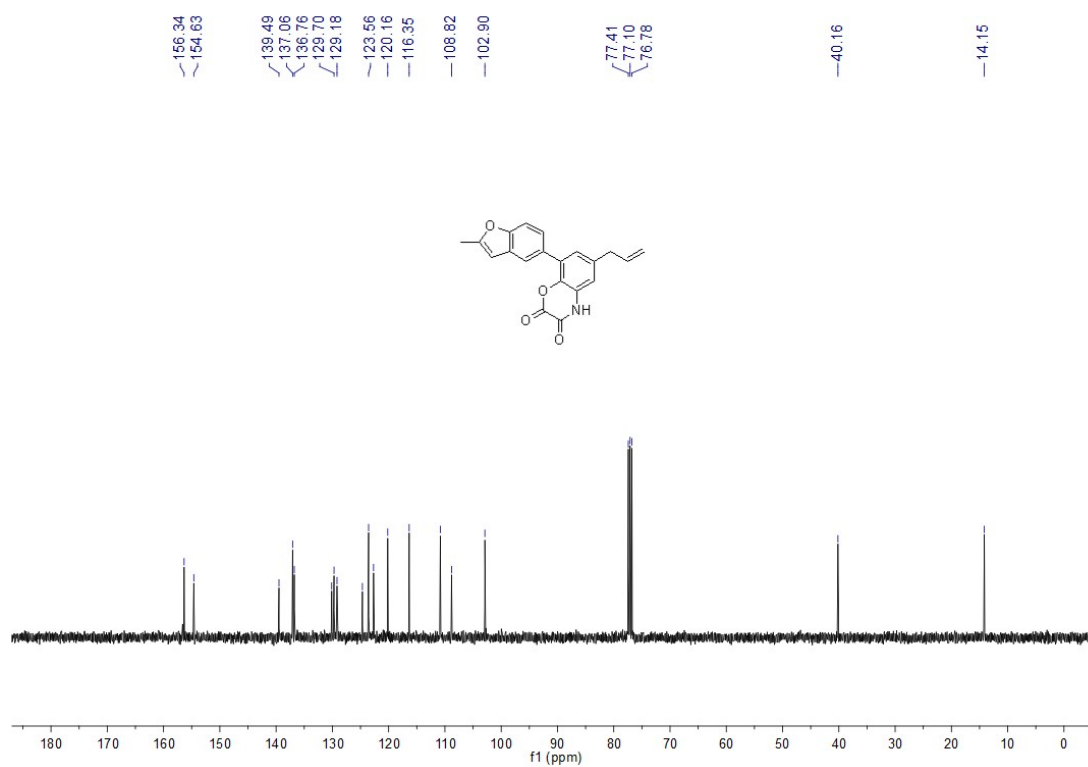

The  $^1\text{H}$  NMR (400MHz,  $\text{CDCl}_3$ ) and  $^{13}\text{C}$  NMR (101 MHz,  $\text{CDCl}_3$ ) of compound **27**

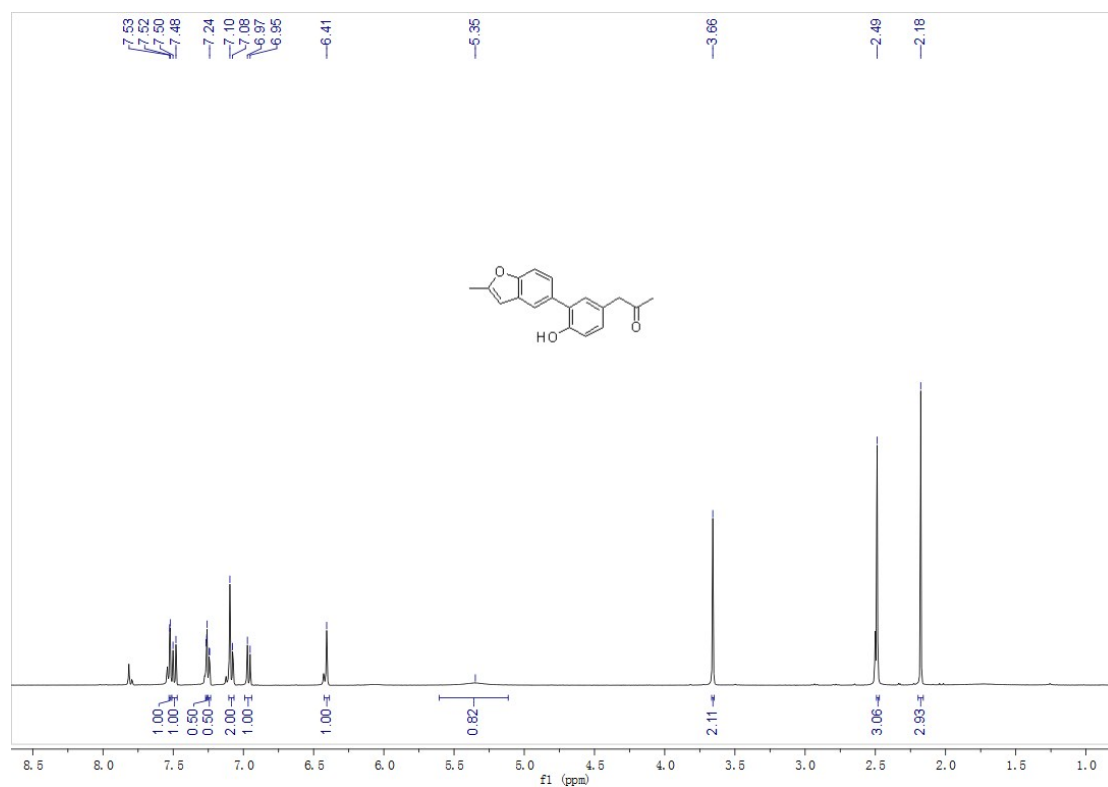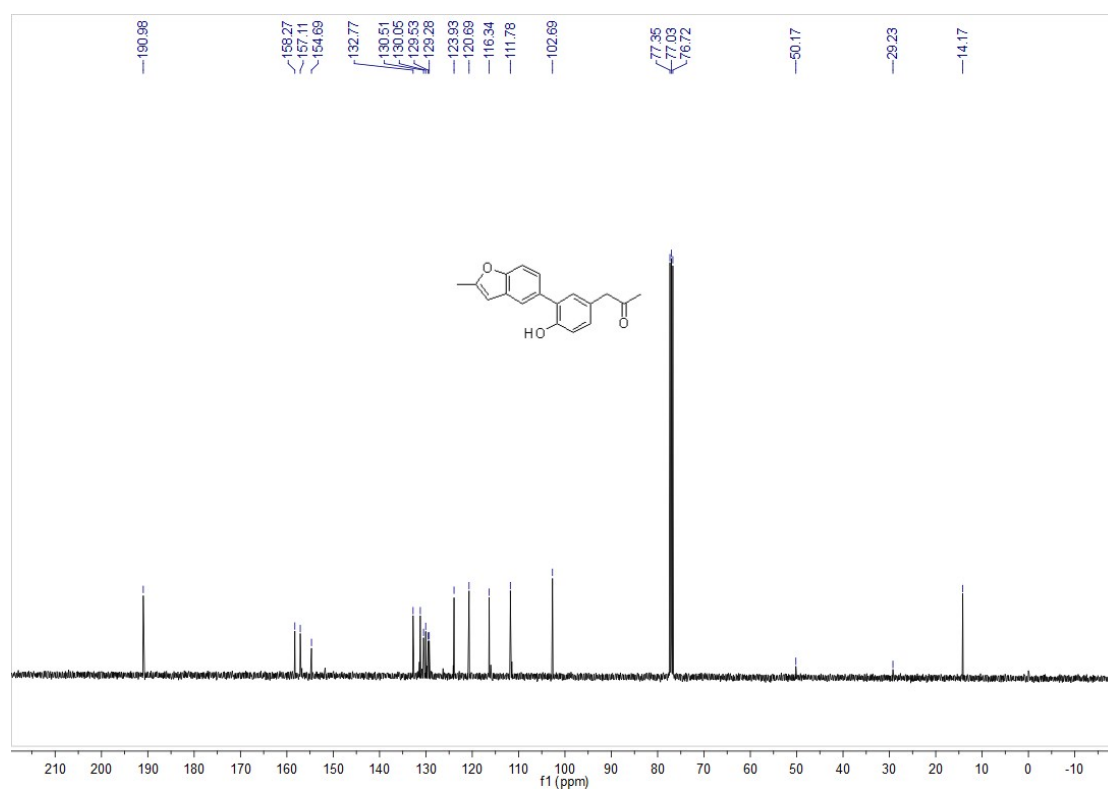

The  $^1\text{H}$  NMR (400MHz,  $\text{CDCl}_3$ ) and  $^{13}\text{C}$  NMR (101 MHz,  $\text{CDCl}_3$ ) of compound **28**

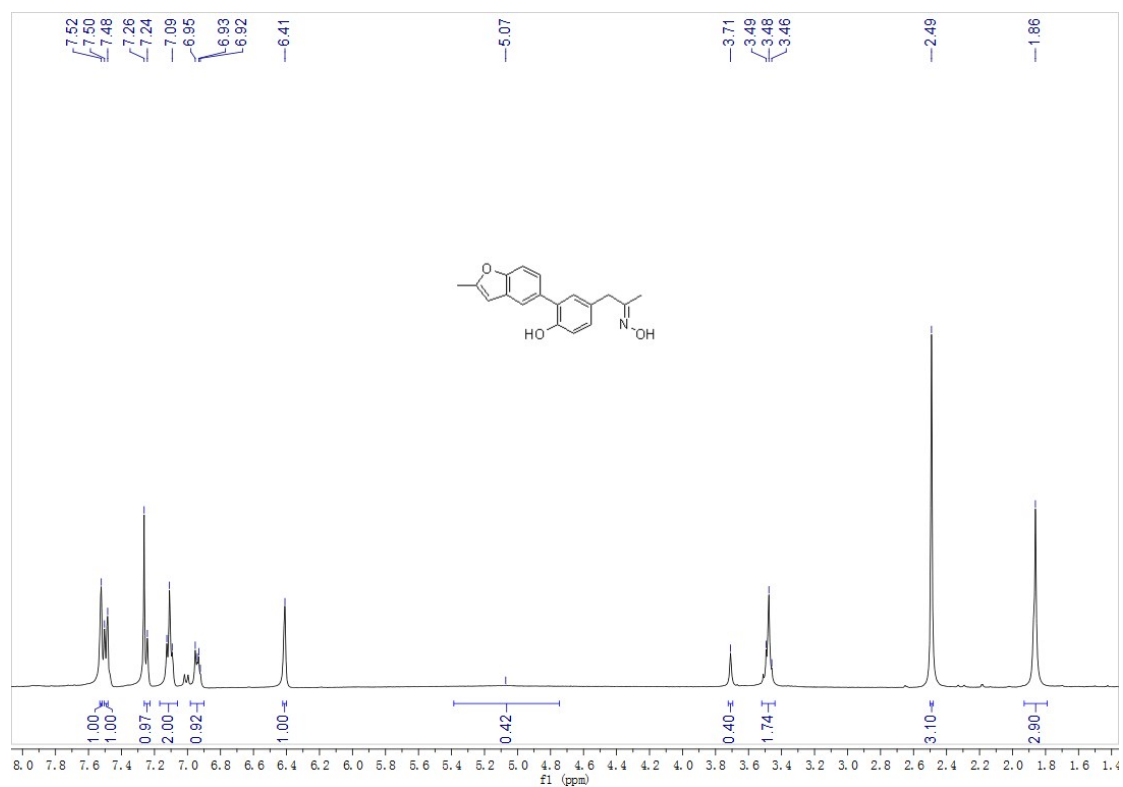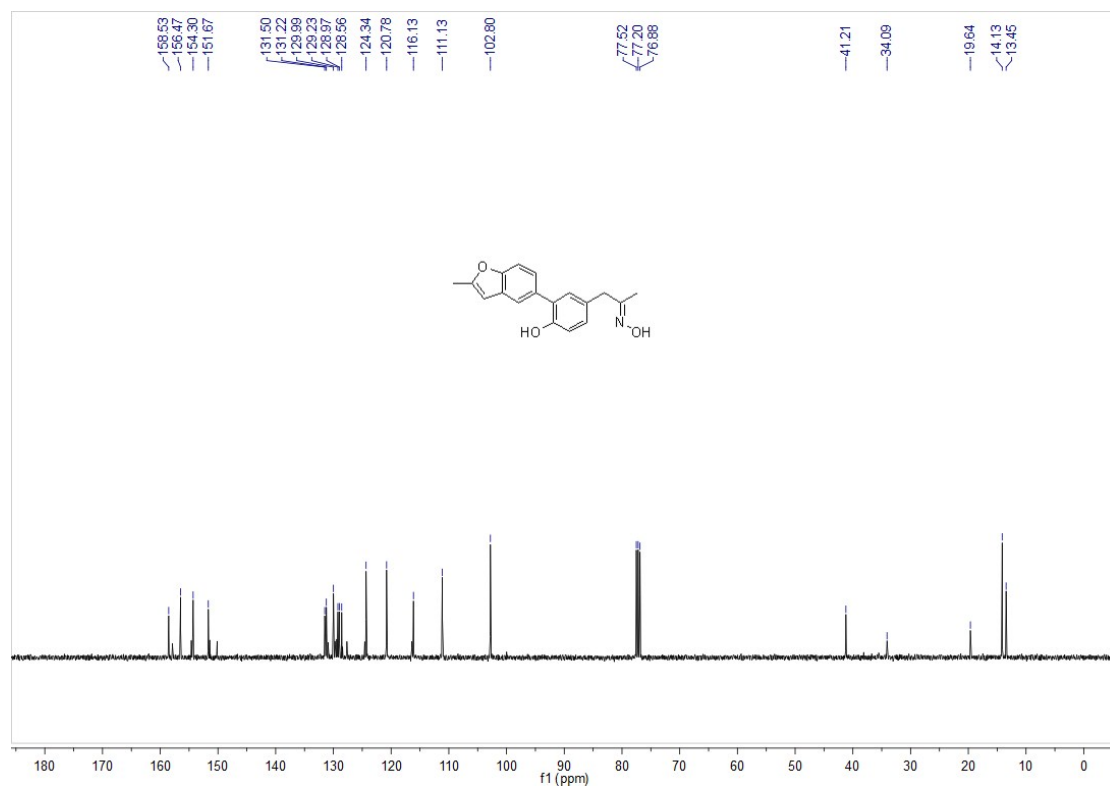

The  $^1\text{H}$  NMR (400MHz, Acetone- $d_6$ ) and  $^{13}\text{C}$  NMR (101 MHz, Acetone- $d_6$ ) of compound **29**

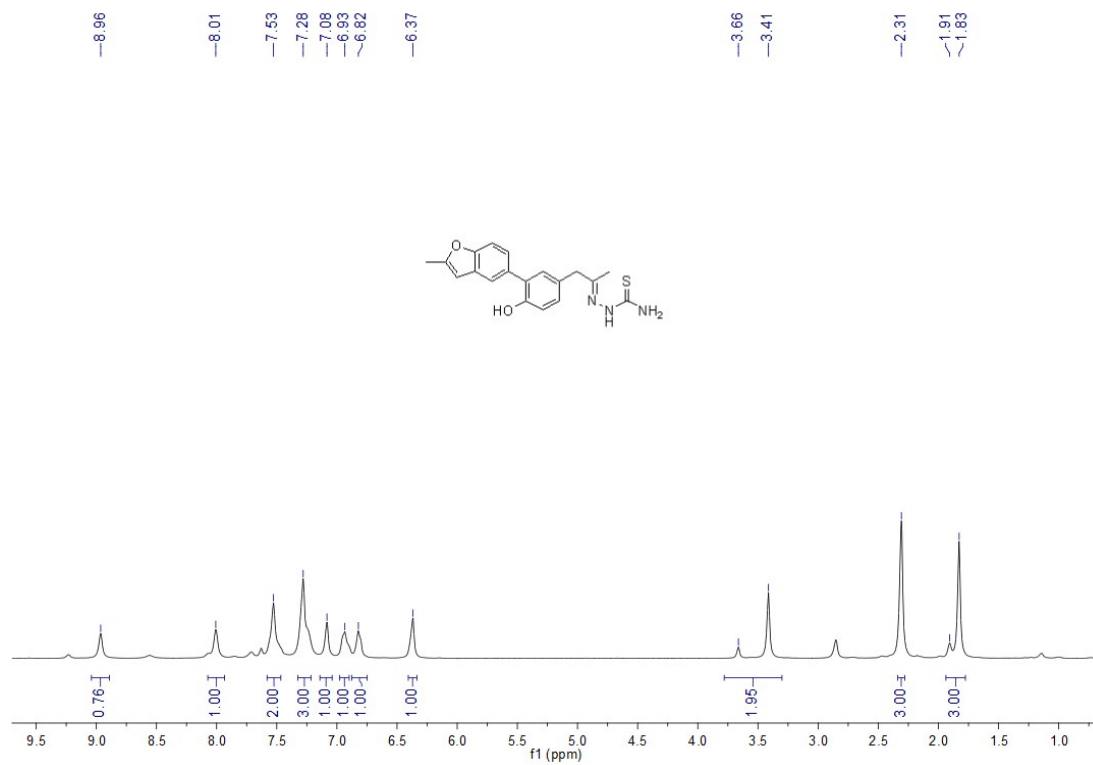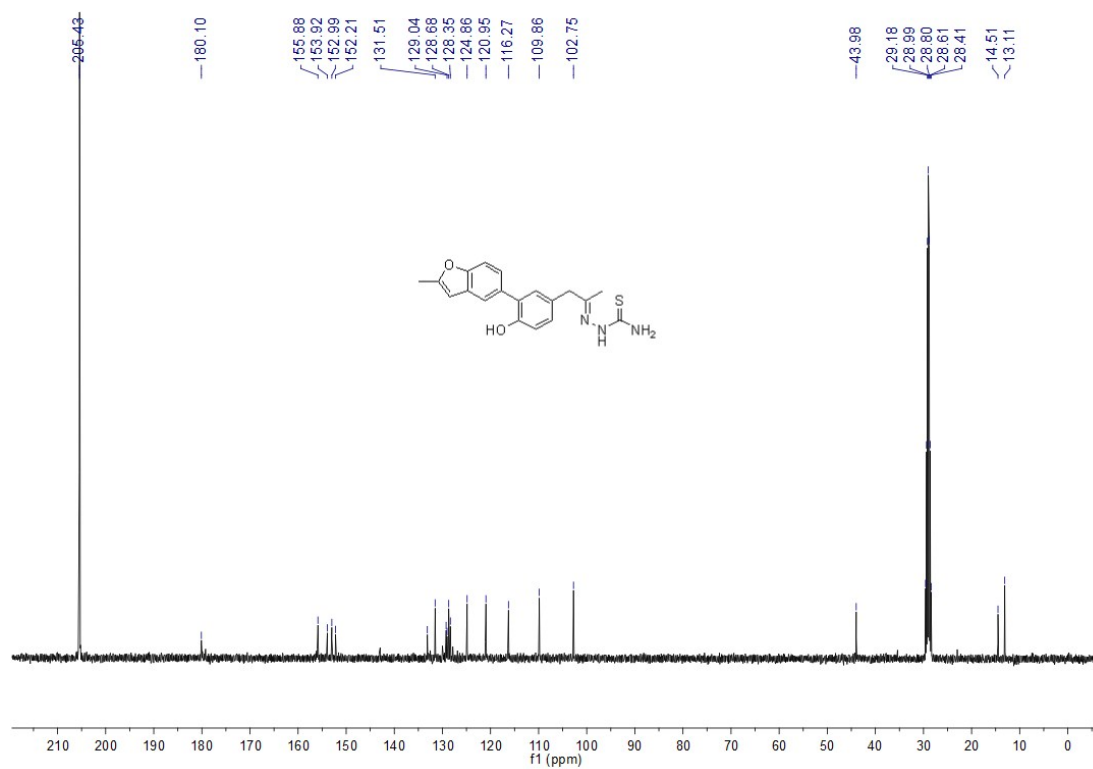

The  $^1\text{H}$  NMR (400MHz,  $\text{CDCl}_3$ ) and  $^{13}\text{C}$  NMR (101 MHz,  $\text{Acetone-}d_6$ ) of compound **30**

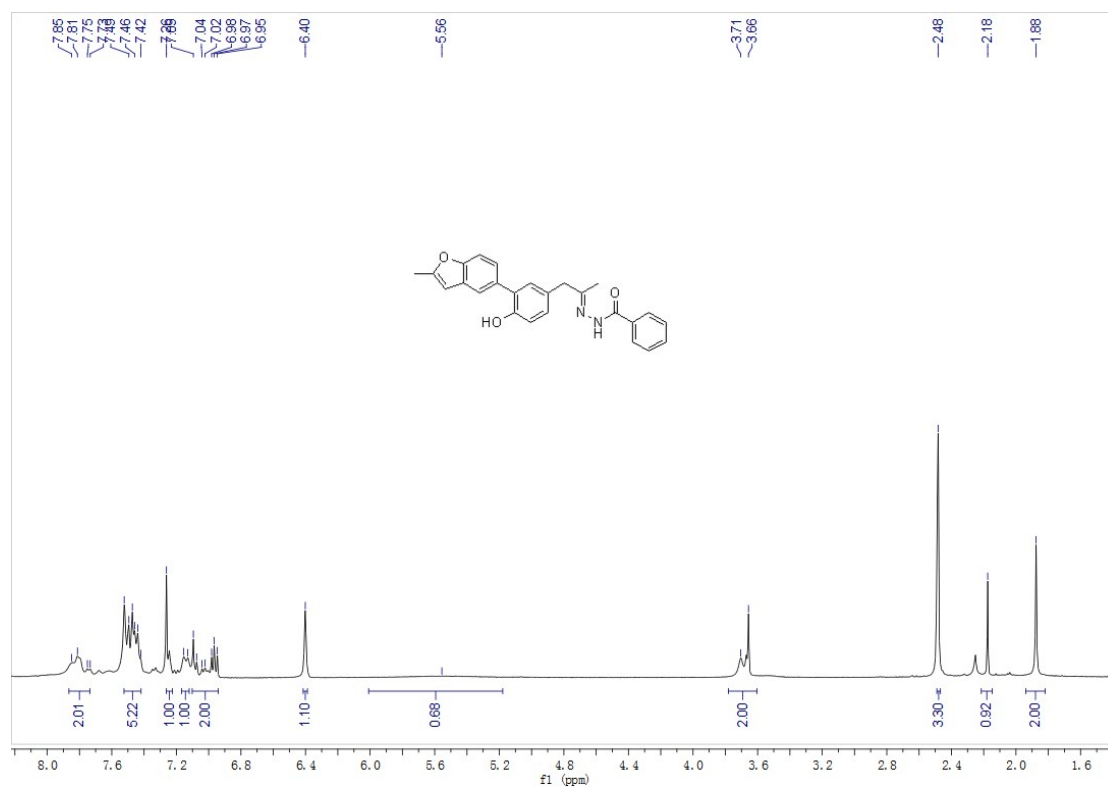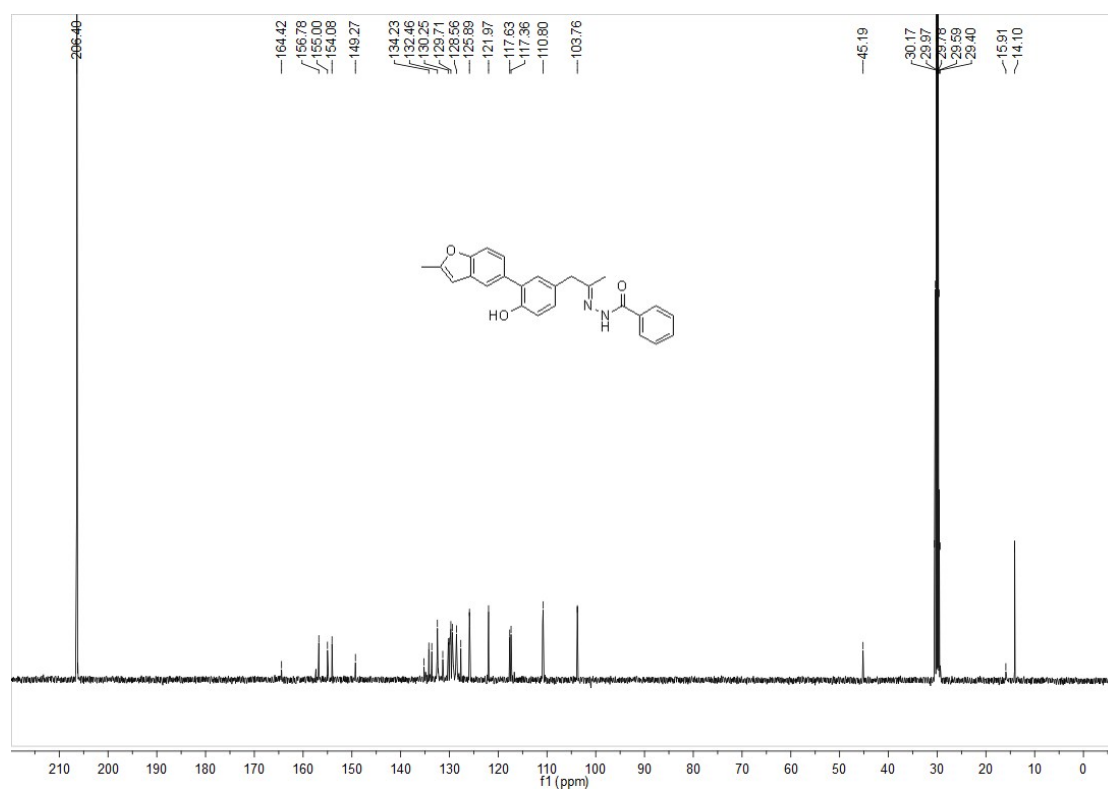

The  $^1\text{H}$  NMR (400MHz,  $\text{DMSO-}d_6$ ) and  $^{13}\text{C}$  NMR (101 MHz,  $\text{DMSO-}d_6$ ) of compound 31

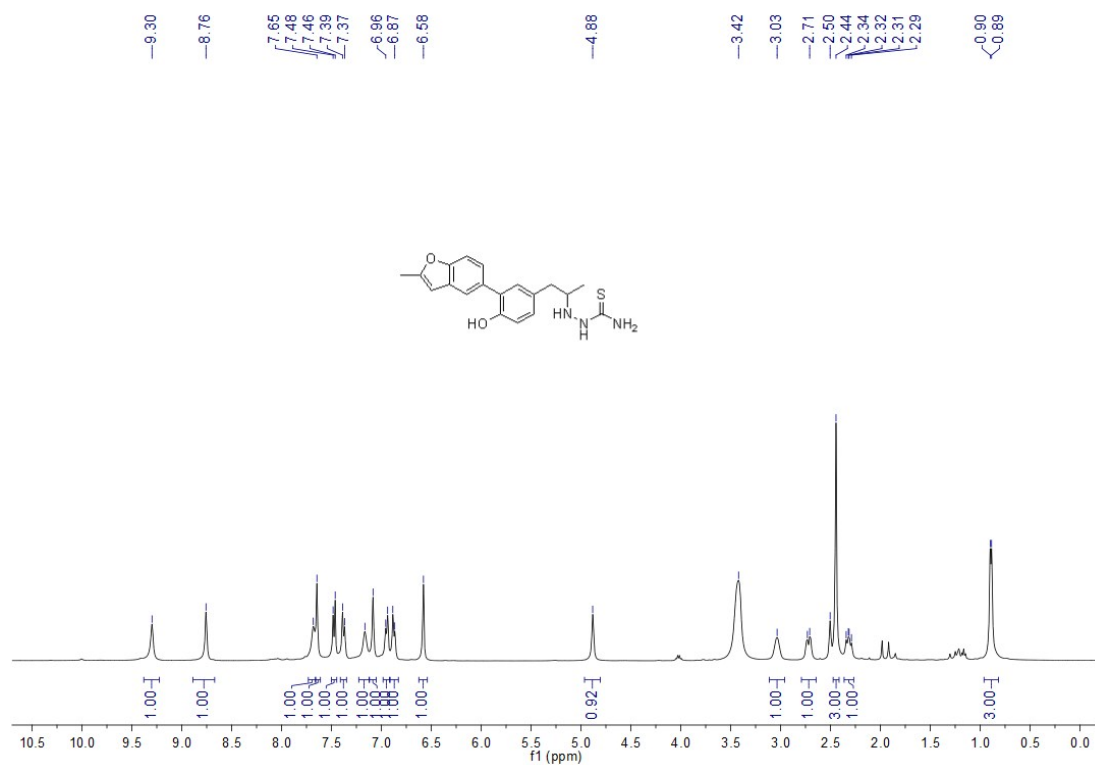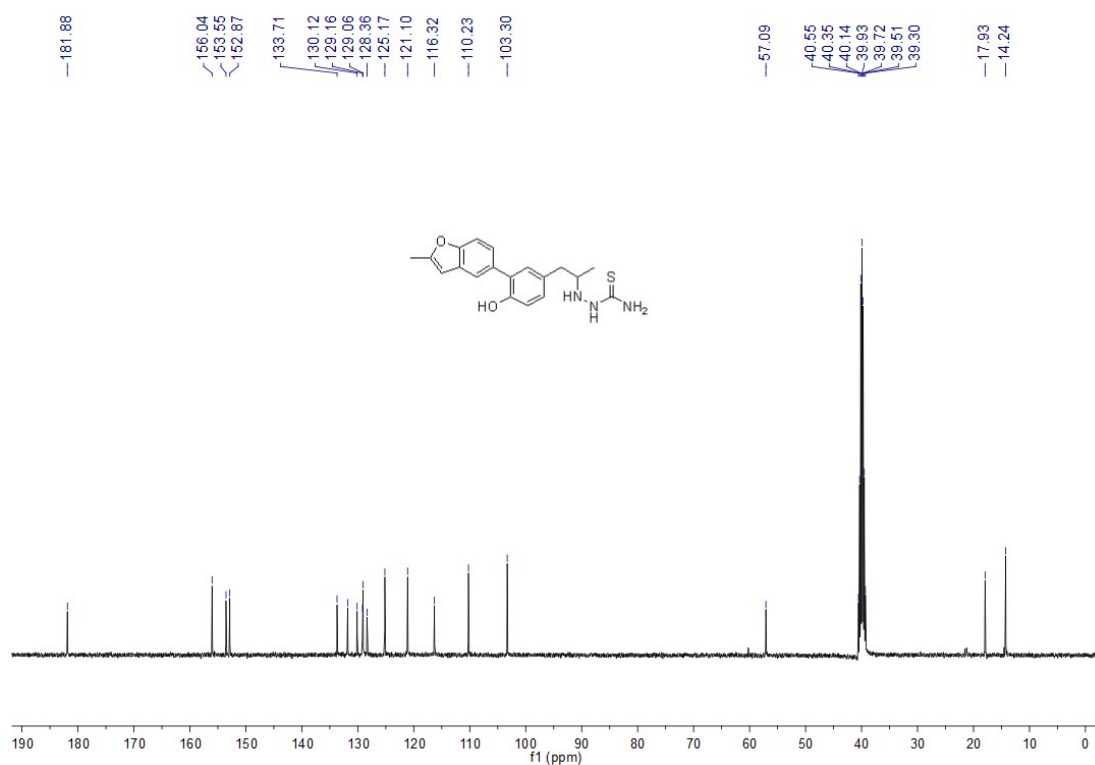



The  $^1\text{H}$  NMR (400MHz,  $\text{CDCl}_3$ ) and  $^{13}\text{C}$  NMR (101 MHz,  $\text{DMSO}-d_6$ ) of compound **32**

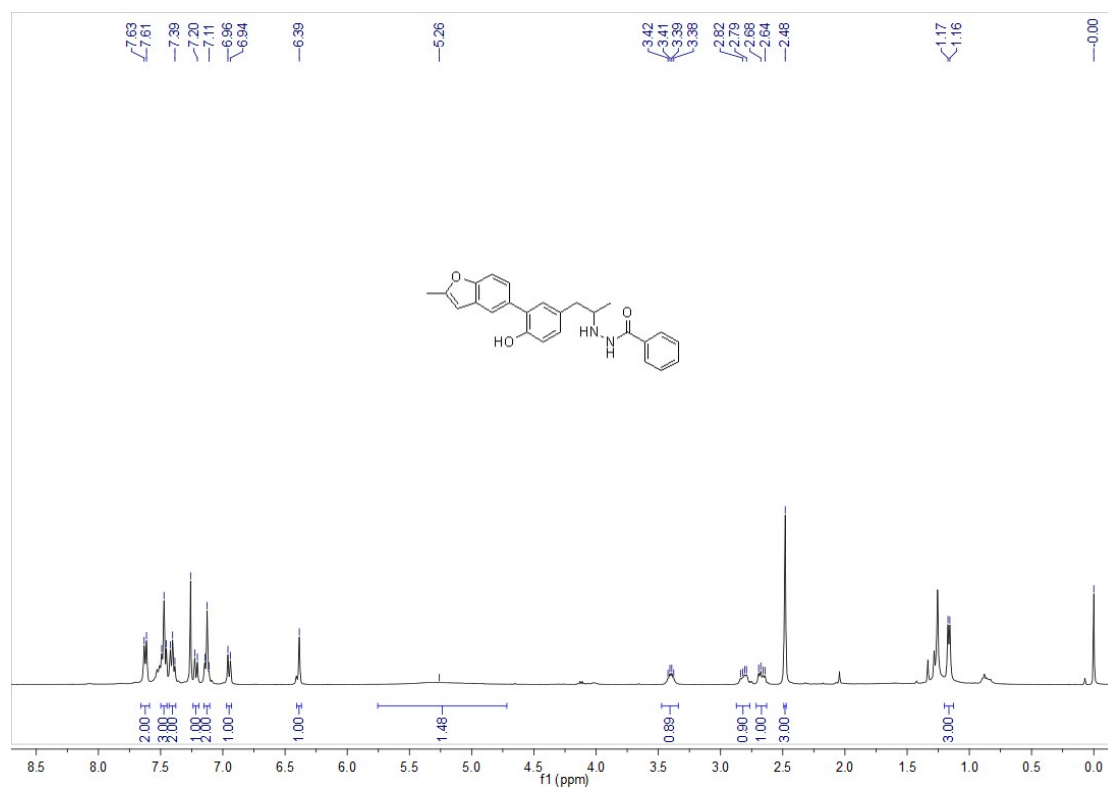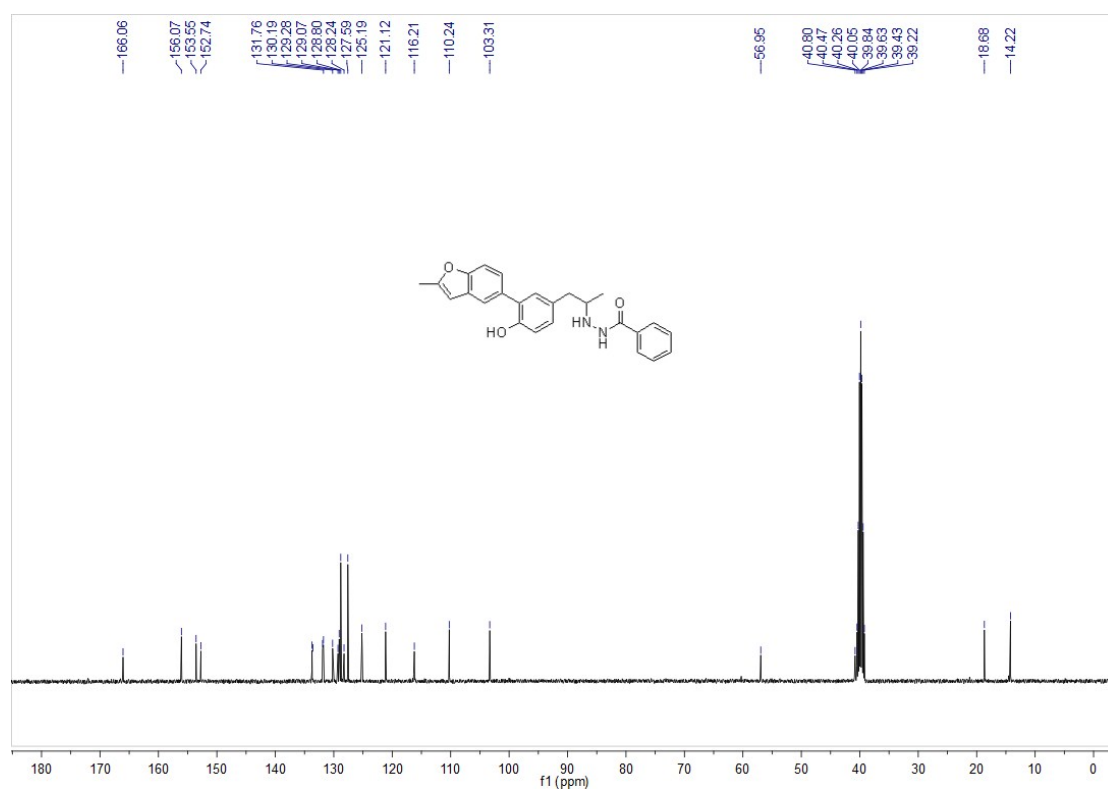

Supplement: c8ra04773a1.pdf [file c8ra04773a1.pdf]
